# Supplementary material for: The solid phase supported peptide synthesis of analogues of the lantibiotic lactocin S
Source: Royal Society of Chemistry journal article supplement (doi:10.1039/c2md20014g), 2012-01-01
Supplement: c2md20014g.pdf [file c2md20014g.pdf]

## Supporting Information

### The Solid Phase Supported Peptide Synthesis of Analogues of the Lantibiotic Lactocin S

*Shaun M. K. McKinnie, Avena C. Ross, Michael J. Little and John C. Vederas \**

Department of Chemistry, University of Alberta, Edmonton, Alberta, Canada, T6G 2G2

\*To whom correspondence should be addressed. Email: [john.vederas@ualberta.ca](mailto:john.vederas@ualberta.ca)

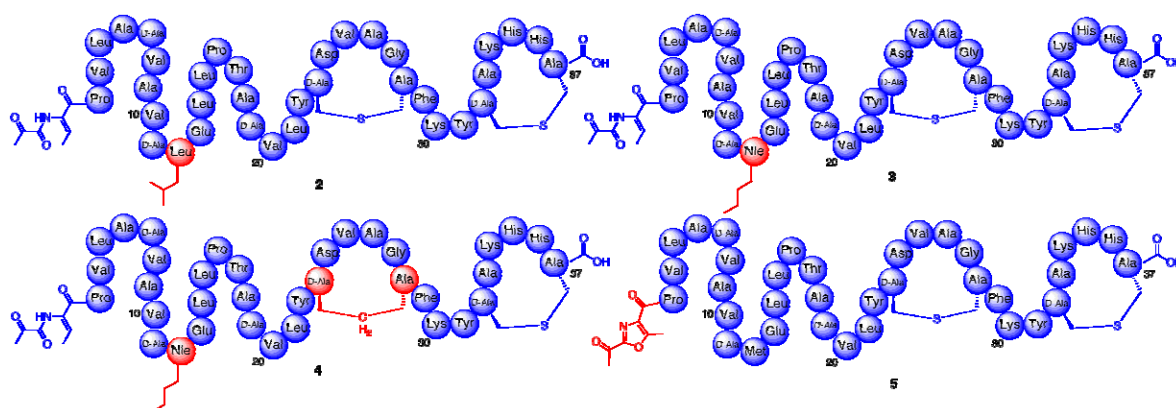

**Supporting Information Contents:**

|                                             |     |
|---------------------------------------------|-----|
| List of Abbreviations                       | S3  |
| General Information                         | S6  |
| Experimental Details                        | S8  |
| HPLC traces of lactocin S analogues         | S30 |
| Biological Testing                          | S31 |
| MS/MS Analysis                              | S37 |
| High Resolution Mass Spectrometry Analyses  | S40 |
| NMR ( $^1\text{H}$ and $^{13}\text{C}$ NMR) | S44 |
| References                                  | S49 |

## List of Abbreviations

|                            |                                               |
|----------------------------|-----------------------------------------------|
| $[\alpha]_{\text{D}}^{26}$ | specific rotation                             |
| Ac <sub>2</sub> O          | acetic anhydride                              |
| All                        | allyl                                         |
| Aloc                       | allyloxycarbonyl                              |
| Boc                        | <i>tert</i> -butoxycarbonyl                   |
| br                         | broad                                         |
| <sup>t</sup> Bu            | <i>tert</i> -butyl                            |
| c                          | concentration                                 |
| C-terminal                 | carboxy terminal                              |
| d                          | doublet                                       |
| DAP                        | diaminopimelate                               |
| DBU                        | 1,8-diazabicyclo[5.4.0]undec-7-ene            |
| DCE                        | 1,2-dichloroethane                            |
| DCM                        | dichloromethane                               |
| DIPEA                      | diisopropylethylamine                         |
| DMF                        | <i>N,N</i> -dimethylformamide                 |
| EDC                        | 1-ethyl-3-(3-dimethylaminopropyl)carbodiimide |
| equiv                      | equivalents                                   |
| ES                         | electrospray                                  |
| ESI                        | electrospray ionization                       |
| Et <sub>3</sub> N          | triethylamine                                 |
| EtOAc                      | ethyl acetate                                 |

|                   |                                                                     |
|-------------------|---------------------------------------------------------------------|
| Et <sub>2</sub> O | diethyl ether                                                       |
| Fmoc              | 9 <i>H</i> -fluorenylmethoxycarbonyl                                |
| FTICR             | Fourier transform ion cyclotron resonance                           |
| HCCA              | 4-hydroxy- $\alpha$ -cyanocinnamic acid                             |
| HOBt              | hydroxybenzotriazole                                                |
| HPLC              | high performance liquid chromatography                              |
| HRMS              | high resolution mass spectrometry                                   |
| IR                | infrared                                                            |
| <i>J</i>          | coupling constant                                                   |
| m                 | multiplet                                                           |
| MALDI-TOF         | matrix-assisted laser desorption ionization – time of flight        |
| MeOH              | methanol                                                            |
| MQ                | milli-Q                                                             |
| MRS               | de Man, Rogosa and Sharpe                                           |
| Ms                | methanesulfonyl                                                     |
| MS                | mass spectrometry                                                   |
| MW                | molecular weight                                                    |
| N-terminal        | amino terminal                                                      |
| N-terminus        | amino terminus                                                      |
| Nle               | norleucine                                                          |
| NMM               | <i>N</i> -methylmorpholine                                          |
| NMR               | nuclear magnetic resonance                                          |
| PyBOP             | (benzotriazol-1-yloxy)tripyrrolidinophosphonium hexafluorophosphate |

|        |                                         |
|--------|-----------------------------------------|
| q      | quartet                                 |
| $R_f$  | retention factor                        |
| RP     | reverse phase                           |
| s      | singlet                                 |
| SPPS   | solid phase peptide synthesis           |
| t      | triplet                                 |
| TBAF   | tetra- <i>N</i> -butylammonium fluoride |
| TBDMS  | <i>tert</i> -butyldimethylsilyl         |
| TCEP   | tris(2-carboxyethyl)phosphine           |
| TFA    | trifluoroacetic acid                    |
| THF    | tetrahydrofuran                         |
| TIPS   | triisopropylsilane                      |
| TLC    | thin layer chromatography               |
| Trt    | triphenylmethyl                         |
| UV-Vis | ultraviolet-visible                     |

## General Information

**Characterization:** NMR spectra were recorded on a Varian Inova 600, Inova 500, Inova 400, Inova 300 or Unity 500 spectrometer. For  $^1\text{H}$  (300, 400, 500 or 600 MHz) spectra,  $\delta$  values were referenced to  $\text{CDCl}_3$  (7.26 ppm) or  $\text{CD}_3\text{OD}$  (3.30 ppm), and for  $^{13}\text{C}$  (75, 100, 125 or 150 MHz) spectra,  $\delta$  values were referenced to  $\text{CDCl}_3$  (77.0 ppm) or  $\text{CD}_3\text{OD}$  (49.0 ppm), as the solvents. Infrared spectra (IR) were recorded on a Nicolet Magna 750 or a 20SX FT-IR spectrometer. Cast refers to the evaporation of a solution on a NaCl plate. Mass spectra (MS) were recorded on a Kratos AEIMS-50, Bruker 9.4T Apex-Qe FTICR (high resolution, HRMS) or on a Perspective Biosystems Voyager<sup>TM</sup> Elite MALDI-TOF MS using either 4-hydroxy- $\alpha$ -cyanocinnamic acid (HCCA) or 3,5-dimethoxy-4-hydroxycinnamic acid (sinapinic acid) as matrices. MS/MS was performed on a Bruker Ultraflextreme MALDI/TOF/TOF. Optical rotations were measured on a Perkin Elmer 241 polarimeter with a microcell (10 cm, 1 mL) at ambient temperature.

**Reagents and solvents:** All commercially available reagents and protected amino acids were purchased and used without further purification. All solvents used for anhydrous reaction were distilled prior to use. Dichloromethane and 1,2-dichloroethane were distilled over calcium hydride, tetrahydrofuran was distilled over sodium with benzophenone as an indicator and ethyl acetate was distilled over potassium carbonate. HPLC grade dimethylformamide and methanol were used without further purification. Commercially available ACS grade solvents (> 99.0% purity) were used for column chromatography without any further purification.

**Reactions and Purifications:** All reactions were performed under an atmosphere of argon. All reactions and fractions from column chromatography were monitored by thin

layer chromatography (TLC) using glass plates with a UV fluorescent indicator (normal SiO<sub>2</sub>, Merck 60 F<sub>254</sub>). One or more of the following methods were used for visualization: UV absorption by fluorescence quenching; Staining with Phosphomolybdic acid in ethanol (10 g/100 mL) or staining with Ninhydrin (Ninhydrin : acetic acid : n-butanol/ 0.6 g : 6 mL : 200 mL) spray. Flash chromatography was performed using Merck type 60, 230-400 mesh silica gel.

High performance liquid chromatography (HPLC) was performed on a Varian Prostar chromatograph equipped with a model 325 variable wavelength UV detector and a Rheodyne 7725i injector fitted with a 100 µL sample loop. The column used was a GE Healthcare stainless steel walled µRPC C2/C18 (3 µm, 4.6 × 100 mm). All HPLC solvents were filtered with a Millipore filtration system under vacuum before use.

## Experimental Details

### Characterization of previously synthesized literature compounds

**(*R*)-2-((((9*H*-fluoren-9-yl)methoxy)carbonyl)amino)-3-((((*S*)-3-(allyloxy)-2-((allyloxy)carbonyl)amino)-3-oxopropyl)thio)propanoic acid (**1a**)**

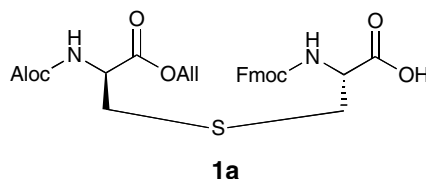

Compound **1a** was synthesized according to literature procedure.<sup>1,2</sup>  $[\alpha]_{\text{D}}^{26}$  -3.30 (*c* 1.0, MeOH); IR (DCM cast) 3325, 3068, 2946, 1720, 1522, 1248, 1210  $\text{cm}^{-1}$ ;  $^1\text{H}$  NMR ( $\text{CD}_3\text{OD}$ , 500 MHz, 2 diastereomers in a  $\sim 9:1$  ratio):  $\delta$  7.78 (d, 2H,  $J = 7.5$  Hz, Ar-H), 7.67 (d, 2H,  $J = 7.0$  Hz, Ar-H), 7.38 (t, 2H,  $J = 7.5$  Hz, Ar-H), 7.30 (t, 2H,  $J = 7.5$  Hz, Ar-H), 5.95-5.84 (m, 2H,  $-\text{OCH}_2\text{CH}=\text{CH}_2$ ), 5.30 (dd, 1H,  $J = 17.0, 1.5$  Hz,  $-\text{OCH}_2\text{CH}=\text{CH}_2$ ), 5.29 (d, 1H,  $J = 17.0$  Hz,  $-\text{OCH}_2\text{CH}=\text{CH}_2$ ), 5.19 (d, 1H,  $J = 10.5$  Hz,  $-\text{OCH}_2\text{CH}=\text{CH}_2$ ), 5.15 (d, 1H,  $J = 11.0$  Hz,  $-\text{OCH}_2\text{CH}=\text{CH}_2$ ), 4.60 (d, 2H,  $J = 5.5$  Hz,  $-\text{OCH}_2$ ), 4.53 (d, 2H,  $J = 5.0$  Hz,  $-\text{OCH}_2$ ), 4.47-4.38 (m, 2H,  $2 \times -\text{CH}_\alpha$ ), 4.37-4.29 (m, 2H, Fmoc- $\text{CH}_2$ ), 4.23 (t, 1H,  $J = 7.0$  Hz, Fmoc- $\text{CH}$ ), 3.11-3.02 (m, 2H,  $-\text{CH}_\beta$ ), 2.98-2.88 (m, 2H,  $-\text{CH}_\beta$ );  $^{13}\text{C}$  NMR ( $\text{CD}_3\text{OD}$ , 125 MHz):  $\delta$  173.8, 172.0, 158.5, 158.3, 145.29, 145.25, 142.6, 134.2, 133.1, 128.8, 128.2, 126.4, 120.9, 118.9, 117.7, 68.3, 67.1, 66.8, 55.7 (major), 55.5 (minor), 55.4 (major), 55.3 (minor), 48.4, 35.5, 35.2; HRMS (ES) Calculated for  $\text{C}_{28}\text{H}_{30}\text{N}_2\text{O}_8\text{S}$  553.1650, found 553.1654 ( $\text{M}+\text{H}$ )<sup>+</sup>. The diastereomeric ratio ( $\sim 9:1$ ) could be determined by integrating the  $^{13}\text{C}$  NMR  $\alpha$ -carbon signal as described previously.<sup>1,2</sup>



**(Z)-2-(2-(tert-butoxycarbonylamino)acrylamido)but-2-enoic acid (6)**

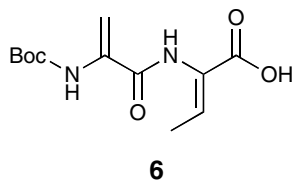

Compound **6** was synthesized according to literature procedure.<sup>3</sup> IR (CHCl<sub>3</sub> cast) 3354, 2980, 2934, 1706, 1506 cm<sup>-1</sup>; <sup>1</sup>H NMR (CD<sub>3</sub>OD, 400 MHz): 6.90 (q, 1H, *J* = 7.2 Hz, C=CHCH<sub>3</sub>), 5.83 (s, 1H, C=CHH), 5.47(s, 1H, C=CHH), 1.77 (d, 3H, *J* = 7.2 Hz, -CH<sub>3</sub>), 1.47 (s, 9H, -C(CH<sub>3</sub>)<sub>3</sub>); <sup>13</sup>C NMR (CD<sub>3</sub>OD, 100 MHz): δ 167.3, 165.7, 154.7, 137.2, 136.9, 128.7, 102.8, 81.5, 28.3, 14.0; HRMS (ES) Calculated for C<sub>12</sub>H<sub>18</sub>N<sub>2</sub>NaO<sub>5</sub> 293.1107, found 293.1106 (M+H)<sup>+</sup>.

**(2S,6R)-2-((((9H-fluoren-9-yl)methoxy)carbonyl)amino)-7-(allyloxy)-6-((((allyloxy)carbonyl)amino)-7-oxoheptanoic acid (4b)**

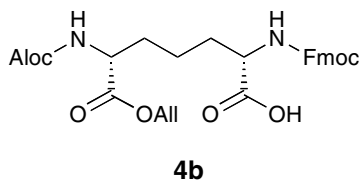

Compound **4b** was synthesized according to literature procedure.<sup>4</sup> [ $\alpha$ ]<sub>D</sub><sup>26</sup> 3.3 (*c* 0.25, DCM); IR (DCM cast) 3327, 3067, 2951, 1722, 1528, 1210 cm<sup>-1</sup>; <sup>1</sup>H NMR (CD<sub>3</sub>OD, 500 MHz): δ 7.76 (d, 2H, *J* = 8 Hz, Ar-H), 7.65 (t, 2H, *J* = 8 Hz, Ar-H), 7.36 (t, 2H, *J* = 8 Hz, Ar-H), 7.29 (t, 2H, *J* = 8 Hz, Ar-H), 5.94-5.85 (m, 2H, -OCH<sub>2</sub>CH=CH<sub>2</sub>), 5.29 (d, 1H, *J* = 17.0 Hz, -OCH<sub>2</sub>CH=CH<sub>2</sub>), 5.28 (d, 1H, *J* = 17.0 Hz, -OCH<sub>2</sub>CH=CH<sub>2</sub>), 5.18 (d, 1H, *J* = 11.0 Hz, -OCH<sub>2</sub>CH=CH<sub>2</sub>), 5.15 (d, 1H, *J* = 10.5 Hz, -OCH<sub>2</sub>CH=CH<sub>2</sub>), 4.58 (m, 2H, -

OCH<sub>2</sub>) 4.52 (m, 2H, -OCH<sub>2</sub>) 4.33 (d, 2H,  $J = 7.0$  Hz, Fmoc-CH<sub>2</sub>) 4.19 (t, 1H,  $J = 7.0$  Hz, Fmoc-CH) 4.17-4.12 (m, 2H,  $2 \times$  -CH <sub>$\alpha$</sub> ) 1.90-1.80 (m, 2H, -CH <sub>$\beta$</sub> ), 1.74-1.62 (m, 2H, -CH <sub>$\beta$</sub> ) 1.58-1.49 (m, 1H, -CH <sub>$2\gamma$</sub> ) 1.49-1.41 (m, 1H, -CH <sub>$2\gamma$</sub> ); <sup>13</sup>C NMR (CD<sub>3</sub>OD, 150 MHz):  $\delta$  173.7, 158.7, 158.5, 145.4, 145.2, 142.6, 134.3, 133.3, 128.8, 128.2, 126.3, 121.0, 118.7, 117.7, 68.0, 66.7, 66.6, 55.5, 55.4, 48.4, 32.2, 32.2, 23.4; HRMS (ES) Calculated for C<sub>29</sub>H<sub>32</sub>N<sub>2</sub>NaO<sub>8</sub> 559.2051, found 559.2047 (M+Na)<sup>+</sup>.

### **General procedure for elongation using Fmoc Solid Phase Peptide Synthesis (SPPS)**

NMM (6 equiv) was added to a solution of Fmoc protected amino acid (5.0 equiv to resin loading), HOBt (5.0 equiv) and PyBOP (4.9 equiv) in DMF (10 mL). The solution was allowed to pre-activate for 5 min. The solution was transferred to the reaction vessel containing pre-swelled resin and was bubbled with argon for 3 h. A small sample of the peptide was cleaved from the resin (by treatment with 95% TFA/2.5% TIPS or anisole<sup>1</sup>/2.5% H<sub>2</sub>O for 2 h) and the completion of the reaction was determined by MALDI-TOF analysis. Resin was washed with DMF (3 × 10 mL), then 20% Ac<sub>2</sub>O in DMF (10 mL) was added to the resin for 10 min to effect end capping. Resin was again washed with DMF (3 × 10 mL). Then 20% piperidine in DMF (3 × 10 mL) was added to remove the N-terminal Fmoc protecting group, this reaction was monitored by UV-Vis spectroscopy, observing the dibenzofulvene-piperidine adduct at  $\lambda = 301$  nm.

### **General procedure for cleavage and purification of lactocin S analogue peptides**

To simultaneously cleave the peptide from 2-chlorotrityl resin, remove side chain protecting groups, and generate the  $\alpha$ -ketoamide functionality at the N-terminus of the peptides, a solution of 95:2.5:2.5 TFA:anisole:H<sub>2</sub>O: was added to the resin-bound peptide for 2 hours. The resin beads were removed via filtration through glass wool and the filtrate was concentrated *in vacuo*. The crude peptide was obtained by precipitation with cold Et<sub>2</sub>O. All cleavage and precipitation steps were done under an atmosphere of argon gas to reduce the oxidation of remaining sulfur atoms in methionine or lanthionine residues. The crude peptide was dissolved in a 1:1 water:methanol (0.1% TFA) and

---

<sup>1</sup> TIPS was used as a scavenger for peptide cleavage up until residue 13. Afterwards, anisole was used instead as it produced cleaner MALDI spectra

injected onto a C<sub>2</sub>/C<sub>18</sub> RP-HPLC column (GE Healthcare, 4.6 x 100 mm, 3 μm) using water (0.1% TFA) and methanol (0.1% TFA) as eluents. TCEP (1.5 mg/L) was added to the HPLC solvents and the product was collected under a stream of argon gas to minimize oxidation of the sulfur atoms in methionine and lanthionine residues. The HPLC method followed was: gradient beginning at 5% methanol for 1 min, climb to 60% over 4 min, then climb to 100% over 8 min, remain at 100% for 2 min, return to 5% over 2 min and remain at 5% for 8 min (flow rate 1 mL/min, UV detection at 220 nm). The peptide was collected as a broad peak at ~13 min and solvent was removed *in vacuo*. The residue was then dissolved in approximately 100 μL methanol and 900 μL water (both with 0.1% TFA) and lyophilized to give the final product.

### Scheme 1. Coupling of protected lanthionine to resin

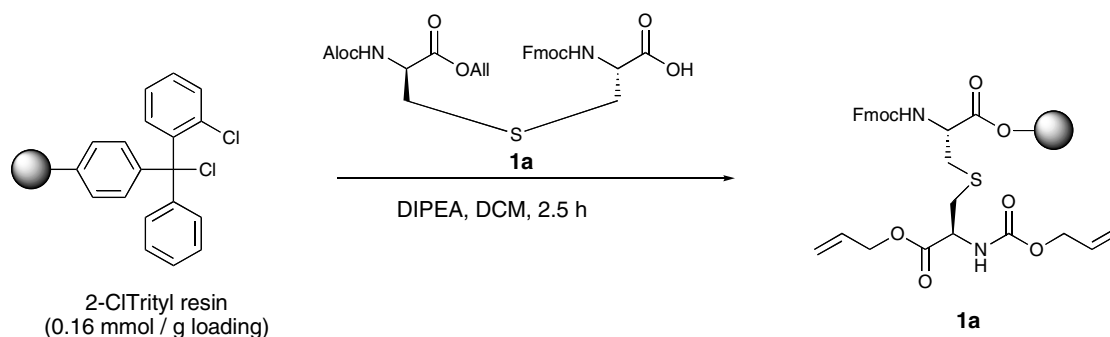

2-Chlorotrityl chloride resin (2.0 g, 2.6 mmol) was pre-swelled in DCM (20 mL) without stirring for 30 min. A solution of orthogonally protected lanthionine **1a** (0.177 g, 0.32 mmol) and DIPEA (0.28 mL, 1.6 mmol) in DCM (20 mL) was added and the mixture stirred very gently for 2.5 h. The slurry was transferred to a peptide reaction vessel and the resin washed with DCM (2 × 20 mL). To cap the remaining reactive sites on the resin a solution of acetic acid (0.114 mL, 2.0 mmol) and DIPEA (1.394 mL, 8.0 mmol) in

DCM (20 mL) was added to the resin and the reaction mixture was bubbled with argon for 2 h. The resin was then washed with DCM (2 × 20 mL). This yielded a resin with a reduced loading (0.16 mmol/g) of reactive sites functionalized with the C-terminal amino acid of lactocin S ready for SPPS.

### Scheme 2. Elongation by SPPS then removal of Aloc/Allyl/Fmoc protecting groups

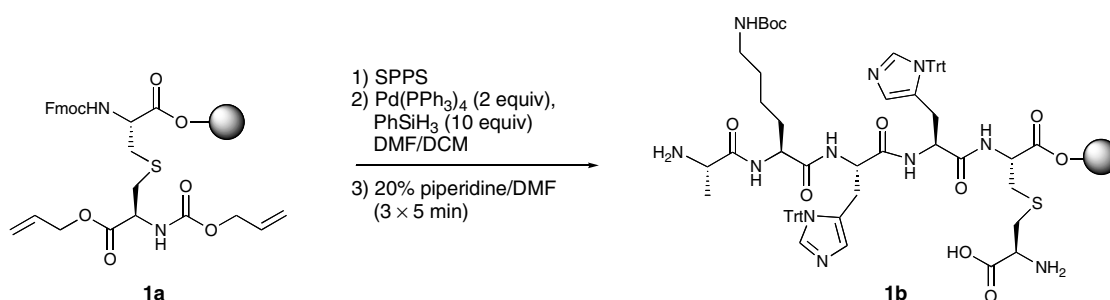

The N-terminal Fmoc protecting group was removed using a solution of 20% piperidine in DMF. The resin bound peptide was coupled with Fmoc-His(Trt)-OH (residues 36 and 35), Fmoc-Lys(Boc)-OH (res. 34) and Fmoc-Ala-OH (res. 33) in the presence of PyBOP and HOBt as coupling reagents using the general elongation procedure described above. To form the B ring of lactocin S, the orthogonal protecting groups of lanthionine were removed to allow cyclization. The Allyl/Aloc groups were removed by treatment of the resin with a solution of  $\text{Pd}(\text{PPh}_3)_4$  (0.739 g, 0.64 mmol) and  $\text{PhSiH}_3$  (0.40 mL, 3.2 mmol) in 1:1 DMF/DCM (40 mL) in the absence of light for 2 h. The resin was then washed with DCM (40 mL) until dark brown color was removed. The resin was then washed with 0.5 % sodiumdiethyldithiocarbamate in DMF (3 × 20 mL) and then DMF (2 × 20 mL). This procedure allowed the removal of any remaining palladium from the resin. The N-terminal Fmoc protecting group was removed using the standard protocol of 20 %

piperidine in DMF. The resin was washed with DCM ( $3 \times 20$  mL) and then DMF ( $3 \times 20$  mL). Resin-bound peptide **1b** was then ready for cyclization to form ring B.

### Scheme 3. Cyclization to form ring B of lactocin S and SPPS elongation

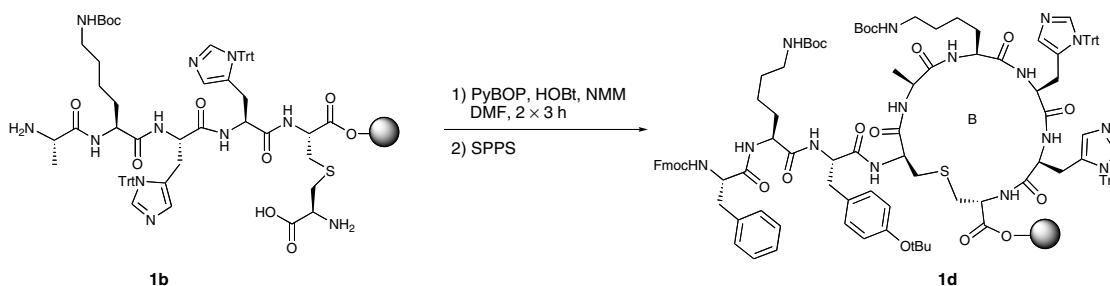

To cyclize the B ring of lactocin S a solution of PyBOP (0.832 g, 1.6 mmol), HOBT (0.216 g, 1.6 mmol) and NMM (0.35 mL, 3.2 mmol) in DMF (20 mL) was added to **1b** on resin and the reaction mixture was bubbled with argon for 2 h. The resin was washed with DMF ( $3 \times 10$  mL) and then a second solution of PyBOP (0.832 g, 1.6 mmol), HOBT (0.216 g, 1.6 mmol) and NMM (0.35 mL, 3.2 mmol) in DMF (20 mL) was added to the resin and the reaction mixture was bubbled with argon for 2 h, generating the macrocyclic ring B **1c**. The N-terminus of the peptide was elongated by Fmoc-SPPS with PyBOP and HOBT as coupling reagents to introduce residues 31-29 (Fmoc-Tyr(<sup>t</sup>Bu)-OH, Fmoc-Lys(Boc)-OH and Fmoc-Phe-OH). A small sample of the resin-bound peptide was treated with TFA/TIPS/H<sub>2</sub>O (95/2.5/2.5) for 2 h to remove the peptide from the solid support. Following filtration the filtrate was concentrated *in vacuo* and the peptide was precipitated by addition of Et<sub>2</sub>O at 0 °C. The resulting white solid was analyzed using MALDI-TOF MS: Calculated for C<sub>66</sub>H<sub>92</sub>N<sub>15</sub>O<sub>13</sub>S 1324.5, found 1324.8 (M+H)<sup>+</sup>.

#### Scheme 4. Formation of ring A of lactocin S and subsequent SPPS elongation

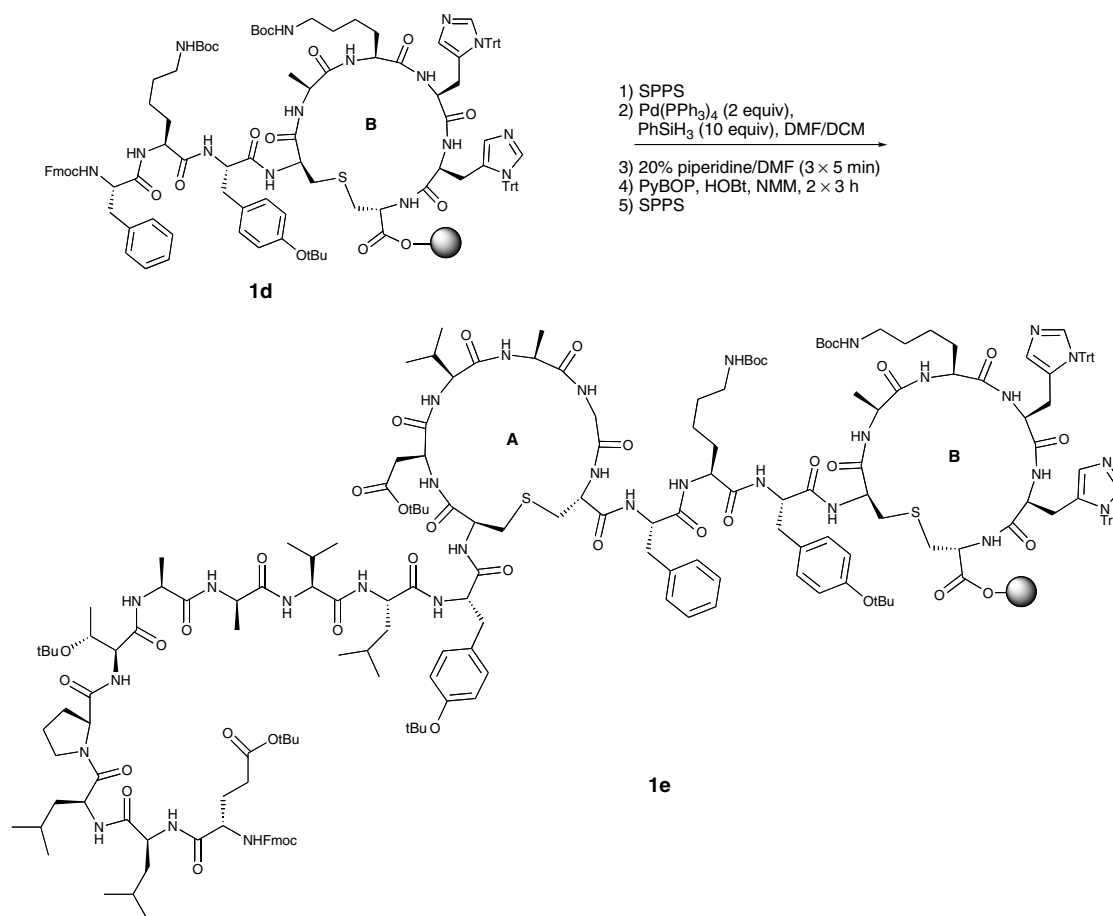

The amino acids of ring A (res. 28-24) of lactocin S were introduced using Fmoc-SPPS in the following order - Fmoc-Aloc/Allyl-lanthionine, Fmoc-Gly-OH, Fmoc-Ala-OH, Fmoc-Val-OH, Fmoc-Asp(O<sup>t</sup>Bu)-OH. Removal of the Allyl/Aloc groups was carried out in an analogous fashion to that described for ring B. The N-terminal Fmoc was deprotected using 20 % piperidine in DMF and after the resin had been washed with DCM and DMF the cyclization of ring A was effected using PyBOP and HOBt as previously described. To investigate the cyclization reaction by MALDI-TOF MS a small sample of resin (5 mg) was coupled with the next amino acid Fmoc-Tyr(O<sup>t</sup>Bu)-OH using PyBOP and HOBt. This sample was then cleaved from the resin using TFA/TIPS/H<sub>2</sub>O as

described for ring B and analyzed by MALDI-TOF MS: Calculated for  $C_{95}H_{121}N_{22}O_{23}S_2$  2001.8, found 2001.8 (M+H)<sup>+</sup>. The amino acids corresponding to residues 13-22 were introduced via Fmoc-SPPS with PyBOP and HOBt as coupling reagents in the order – Fmoc-Tyr(O<sup>t</sup>Bu)-OH, Fmoc-Leu-OH, Fmoc-Val-OH, Fmoc-D-Ala-OH, Fmoc-Ala-OH, Fmoc-Thr(O<sup>t</sup>Bu)-OH, Fmoc-Pro-OH, Fmoc-Leu-OH, Fmoc-Leu-OH, Fmoc-Glu(O<sup>t</sup>Bu)-OH. A small sample was then cleaved from the resin using TFA/TIPS/H<sub>2</sub>O as described for rings A and B and analyzed by MALDI-TOF MS: Calculated for  $C_{138}H_{194}N_{31}O_{35}S_2$  2908.4, found 2910.5 (M+H)<sup>+</sup>. Subsequently, the resin was partitioned into 3 equal parts (0.107 mmol each) in order to synthesize novel analogs of lactocin S differing at residue 12.

**Scheme 5. Incorporation of Leu-12 and subsequent synthesis of Leu-12 lactocin S (2)**

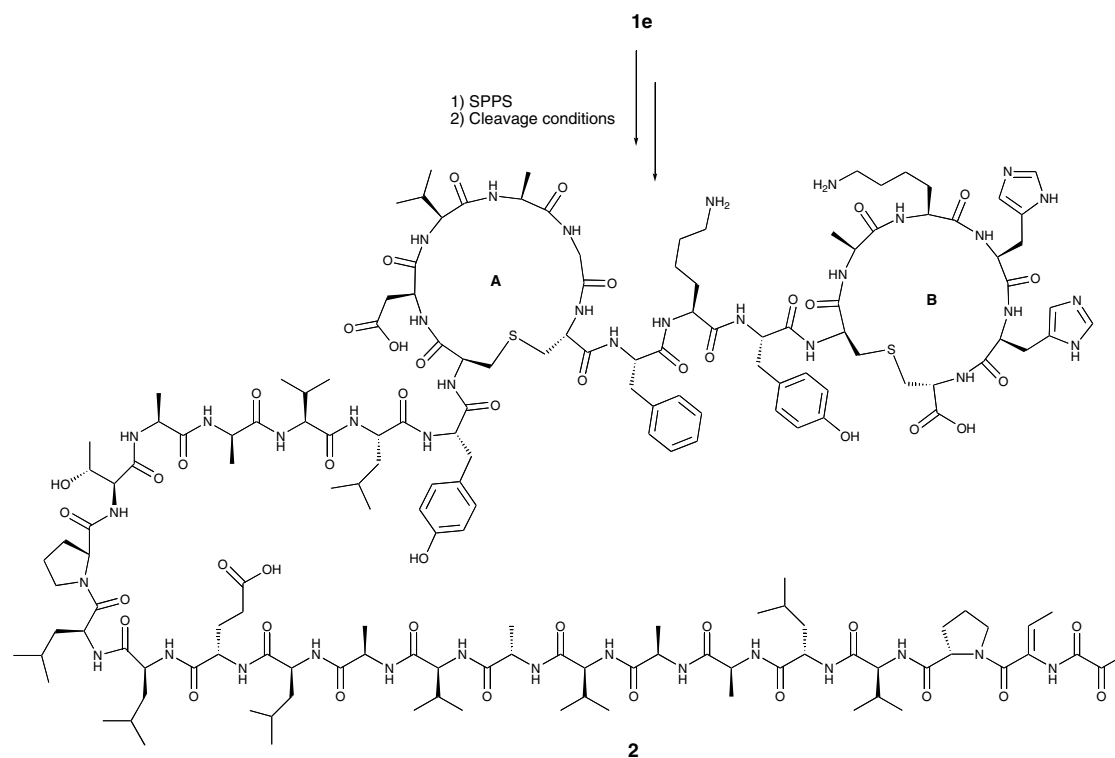



Resin-bound **1e** (0.107 mmol) was transferred to a peptide synthesis vessel and pre-swelled in DMF (10 mL) for 15 min. After endcapping was performed, a pre-activated solution of Fmoc-Leu-OH (94 mg, 0.27 mmol), PyBOP (136 mg, 0.26 mmol), HOBt (36 mg, 0.27 mmol), and NMM (35  $\mu$ L, 0.32 mmol) in DMF (10 mL) was added and bubbled with argon for 3 hours. The amino acids corresponding to residues 3-11 were also introduced via Fmoc-SPPS with PyBOP and HOBt as coupling reagents in the following order: Fmoc-D-Ala-OH, Fmoc-Val-OH, Fmoc-Ala-OH, Fmoc-Val-OH, Fmoc-D-Ala-OH, Fmoc-Ala-OH, Fmoc-Leu-OH, Fmoc-Val-OH, Fmoc-Pro-OH. A small sample was then cleaved from the resin using TFA/anisole/H<sub>2</sub>O as described for rings A and B and analyzed by MALDI-TOF MS: Calculated for C<sub>182</sub>H<sub>270</sub>N<sub>41</sub>O<sub>45</sub>S<sub>2</sub> 3812.9, found 3814.3 (M+H)<sup>+</sup>. The N-terminal dipeptide **6** was coupled to the Fmoc deprotected 3-37 lactocin fragment using standard solid phase methodology. A pre-activated solution of the dipeptide (61 mg, 0.23 mmol), PyBOP (115 mg, 0.22 mmol), HOBt (31 mg, 0.23 mmol), and NMM (30  $\mu$ L, 0.27 mmol) in DMF (10 mL) was added and bubbled with argon for 3 hours. After rinsing with DMF, a second 3 hour coupling was subsequently performed with a similarly pre-activated solution of the dipeptide in DMF (10 mL). The peptide was then cleaved from the resin yielding crude peptide (23.1 mg) and was purified as described previously to give 1.0 mg of product (overall yield = 1.5%) as a fluffy white solid. Monoisotopic MW calculated for C<sub>174</sub>H<sub>267</sub>N<sub>42</sub>O<sub>46</sub>S<sub>2</sub> 3744.9286, found *high resolution* (FTICR-ESI-MS) 3744.9269 (M+H)<sup>+</sup>.

**Scheme 6. Incorporation of Nle-12 and subsequent synthesis of Nle-12 lactocin S (3)**

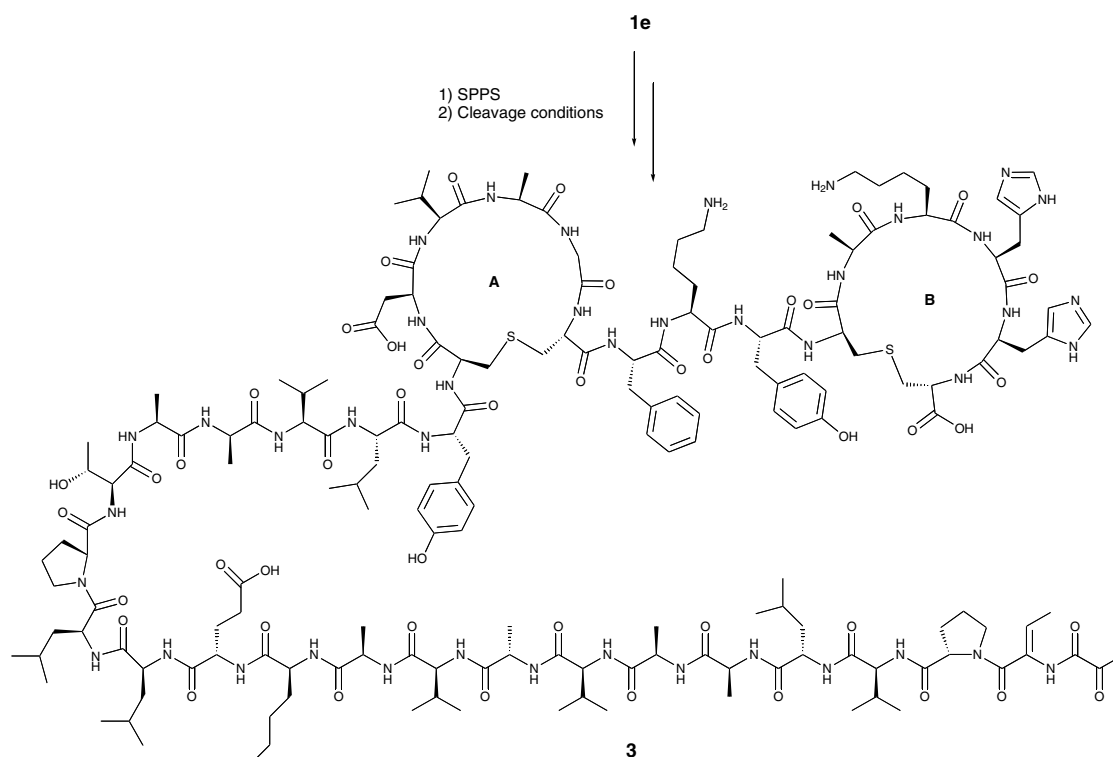

Resin-bound **1e** (0.107 mmol) was transferred to a peptide synthesis vessel and pre-swelled in DMF (10 mL) for 15 min. After endcapping was performed, a pre-activated solution of Fmoc-Nle-OH (94 mg, 0.27 mmol), PyBOP (136 mg, 0.26 mmol), HOBT (36 mg, 0.27 mmol), and NMM (35  $\mu$ L, 0.32 mmol) in DMF (10 mL) was added and bubbled with argon for 3 hours. The amino acids corresponding to residues 3-11 were also introduced via Fmoc-SPPS with PyBOP and HOBT as coupling reagents in the order - Fmoc-D-Ala-OH, Fmoc-Val-OH, Fmoc-Ala-OH, Fmoc-Val-OH, Fmoc-D-Ala-OH, Fmoc-Ala-OH, Fmoc-Leu-OH, Fmoc-Val-OH, Fmoc-Pro-OH. A small sample was then cleaved from the resin using TFA/anisole/H<sub>2</sub>O as described for rings A and B and analyzed by MALDI-TOF MS: Calculated for C<sub>182</sub>H<sub>270</sub>N<sub>41</sub>O<sub>45</sub>S<sub>2</sub> 3812.9, found 3814.4 (M+H)<sup>+</sup>. The N-terminal dipeptide **6** was coupled to the Fmoc deprotected 3-37 lactocin fragment using standard solid phase methodology. Quantitatively, a pre-activated

solution of the dipeptide (61 mg, 0.23 mmol), PyBOP (115 mg, 0.22 mmol), HOBt (31 mg, 0.23 mmol), and NMM (30  $\mu$ L, 0.27 mmol) in DMF (10 mL) was added and bubbled with argon for 3 hours. After rinsing with DMF, a second 3 hour coupling was subsequently performed with a similarly pre-activated solution of the dipeptide in DMF (10 mL). The peptide was then cleaved from the resin yielding crude peptide (14.2 mg) and was purified as described previously to give 0.8 mg of product (overall yield = 0.8%) as a fluffy white solid. Monoisotopic MW calculated for  $C_{174}H_{267}N_{42}O_{46}S_2$  3744.9286 found *high resolution* (FTICR-ESI-MS) 3744.9281 (M+H)<sup>+</sup>.

#### Scheme 7. Synthesis of NleDAP lactocin S analogue (4)

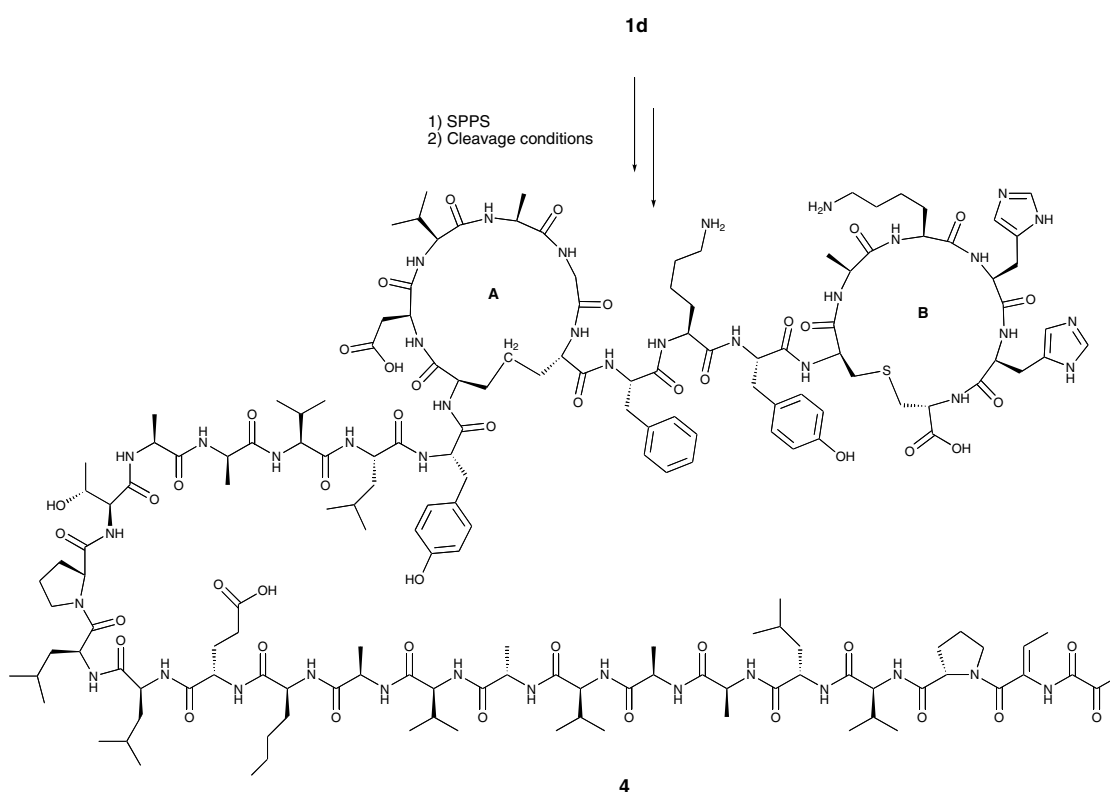

Orthogonally protected DAP **4b** was coupled to resin-bound peptide **1d** using Fmoc-SPPS methodology. The remainder of the amino acids of ring A (res. 27-24) of lactocin

S were introduced using Fmoc-SPPS in the following order - Fmoc-Gly-OH, Fmoc-Ala-OH, Fmoc-Val-OH, Fmoc-Asp(O<sup>t</sup>Bu)-OH. Removal of the Allyl/Aloc groups was carried out in an analogous fashion to that described for ring B. The N-terminal Fmoc was deprotected using 20 % piperidine in DMF and after the resin had been washed with DCM and DMF the cyclization of ring A was effected using PyBOP and HOBt as previously described. To determine the success of the cyclization reaction by MALDI-TOF MS a small sample of resin (5 mg) was coupled with the next amino acid Fmoc-Tyr(O<sup>t</sup>Bu)-OH using PyBOP and HOBt. This sample was then cleaved from the resin using TFA/TIPS/H<sub>2</sub>O as described for ring B and analyzed by MALDI-TOF MS:

Calculated for C<sub>96</sub>H<sub>123</sub>N<sub>22</sub>O<sub>23</sub>S 1982.9, found 1983.2 (M+H)<sup>+</sup>. The amino acids corresponding to residues 3-22 were introduced via Fmoc-SPPS with PyBOP and HOBt as coupling reagents in the order – Fmoc-Tyr(O<sup>t</sup>Bu)-OH, Fmoc-Leu-OH, Fmoc-Val-OH, Fmoc-D-Ala-OH, Fmoc-Ala-OH, Fmoc-Thr(O<sup>t</sup>Bu)-OH, Fmoc-Pro-OH, Fmoc-Leu-OH, Fmoc-Leu-OH, Fmoc-Glu(O<sup>t</sup>Bu)-OH, Fmoc-Nle-OH, Fmoc-D-Ala-OH, Fmoc-Val-OH, Fmoc-Ala-OH, Fmoc-Val-OH, Fmoc-D-Ala-OH, Fmoc-Ala-OH, Fmoc-Leu-OH, Fmoc-Val-OH and Fmoc-Pro-OH. A small sample was then cleaved from the resin using TFA/anisole/H<sub>2</sub>O as described for rings A and B and analyzed by MALDI-TOF MS:

Calculated for C<sub>183</sub>H<sub>272</sub>N<sub>41</sub>O<sub>45</sub>S 3796.0, found 3798.3 (M+H)<sup>+</sup>. The N-terminal dipeptide **6** was coupled to the Fmoc deprotected 3-37 lactocin S fragment using standard solid phase methodology. Quantitatively, a pre-activated solution of the dipeptide (147 mg, 0.54 mmol), PyBOP (230 mg, 0.53 mmol), HOBt (61 mg, 0.54 mmol), and NMM (60 μL, 0.65 mmol) in DMF (10 mL) was added and bubbled with argon for 3 hours. After rinsing with DMF, a second 3 hour coupling was subsequently performed with a similarly

pre-activated solution of the dipeptide in DMF (10 mL). The peptide was then cleaved from the resin yielding crude peptide (39.5 mg) and was purified as described previously to give 1.0 mg of product (overall yield = 1.8%) as a fluffy white solid. Monoisotopic MW calculated for  $C_{175}H_{269}N_{42}O_{46}S$  3726.9722, found *high resolution* (FTICR-ESI-MS) 3726.9716 ( $M+H$ )<sup>+</sup>.

**Scheme 8. SPPS elongation to form res 3-37 of lactocin S (1f)**

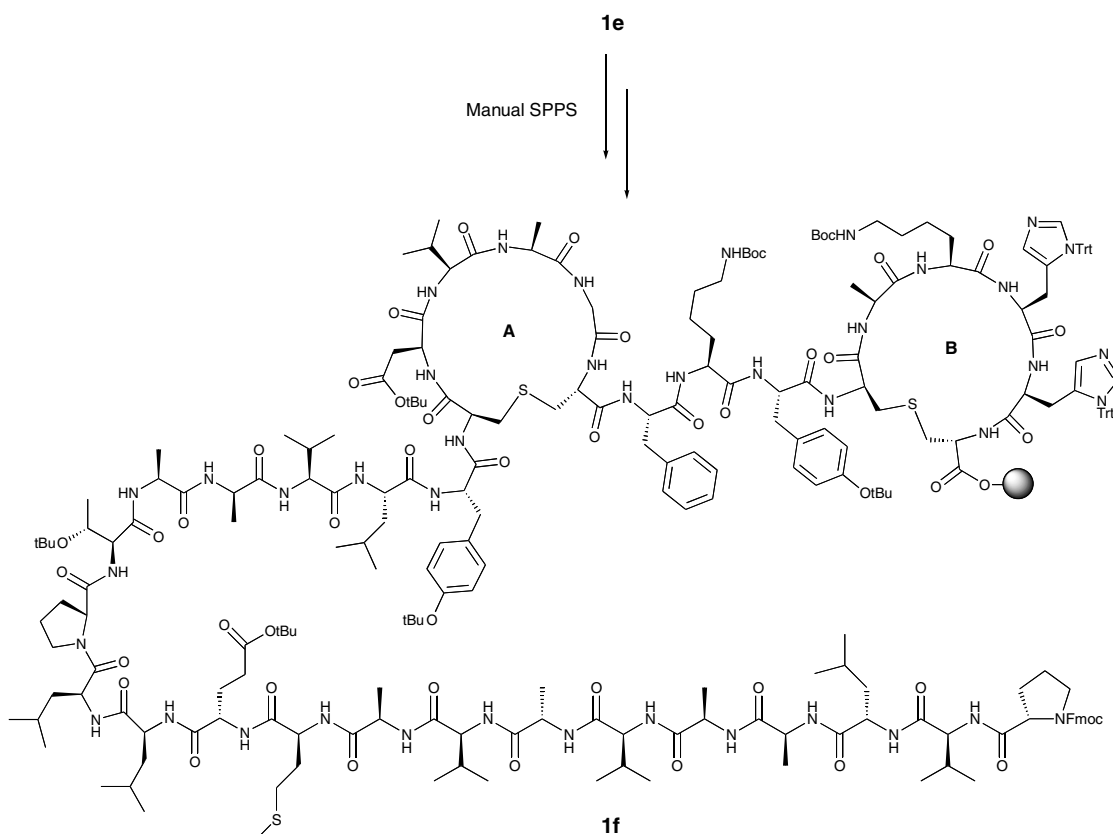

Resin-bound **1e** (0.107 mmol) was transferred to a peptide synthesis vessel and pre-swelled in DMF (10 mL) for 15 min. The amino acids corresponding to residues 3-12 of natural lactocin S were also introduced via Fmoc-SPPS with PyBOP and HOBT as coupling reagents in the order: Fmoc-Met-OH, Fmoc-D-Ala-OH, Fmoc-Val-OH, Fmoc-

Ala-OH, Fmoc-Val-OH, Fmoc-D-Ala-OH, Fmoc-Ala-OH, Fmoc-Leu-OH, Fmoc-Val-OH, Fmoc-Pro-OH. A small sample was then cleaved from the resin using TFA/anisole/H<sub>2</sub>O as described for rings A and B and analyzed by MALDI-TOF MS: Calculated for C<sub>181</sub>H<sub>268</sub>N<sub>41</sub>O<sub>45</sub>S<sub>3</sub> 3831.9, found 3832.6 (M+H)<sup>+</sup>.

**Scheme 9. Synthesis of 2-(1-(*tert*-butoxycarbonylamino)vinyl)-5-methyloxazole-4-carboxylic acid**

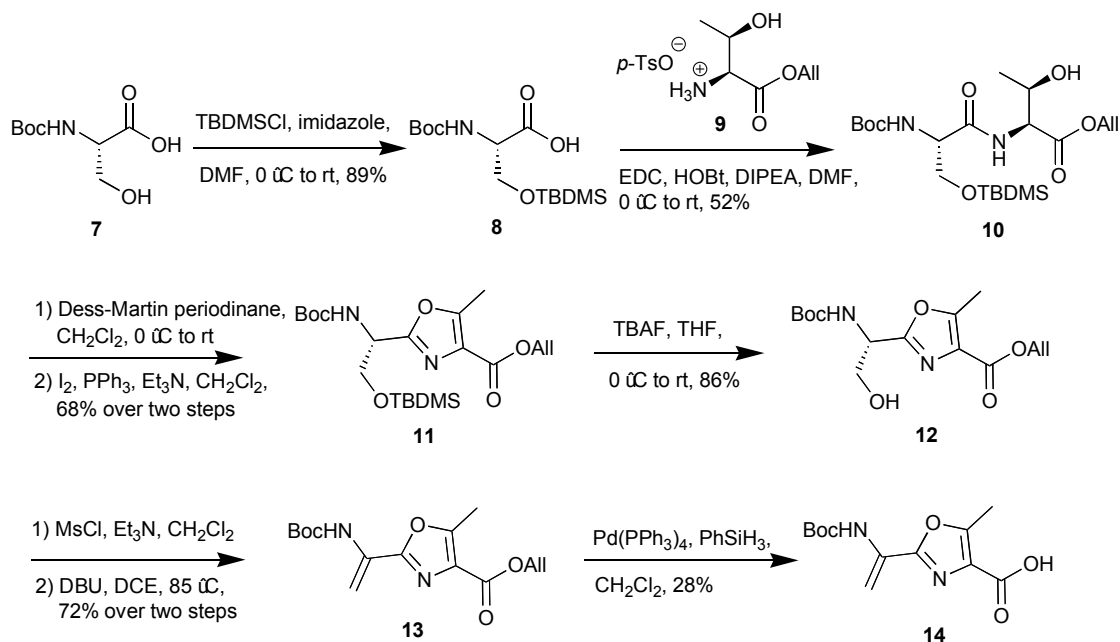

**(*S*)-2-((*tert*-butoxycarbonyl)amino)-3-((*tert*-butyldimethylsilyl)oxy)propanoic acid**

(8)

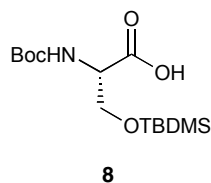

This known compound was prepared according to literature procedure.<sup>5</sup> Imidazole (15.1 g, 244 mmol) was added to a solution of Boc-Ser-OH (7) (20.0 g, 97.5 mmol) and

TBDMS-Cl (16.2 g, 107 mmol) in DMF (200 mL) at 0 °C. Reaction was allowed to warm to rt and was stirred for 16 h, then the solvent was removed *in vacuo*. The residue was re-dissolved in EtOAc:MeOH (95 mL:5 mL), washed with H<sub>2</sub>O and dried over Na<sub>2</sub>SO<sub>4</sub>. The solvent was removed *in vacuo* to yield **8** (27.7 g, 89.1 %) as a pale yellow oil. The crude product was carried through to the next reaction without further purification. (*R<sub>f</sub>* 0.83 on SiO<sub>2</sub>, 1:1 hexanes:EtOAc); [ $\alpha$ ]<sub>D</sub><sup>26</sup> 5.96 (*c* 1.0, MeOH); IR (MeOH cast) 3329, 3148, 2978, 2935, 2880, 2646, 1708, 1519, 1167 cm<sup>-1</sup>; <sup>1</sup>H NMR (CD<sub>3</sub>OD, 300 MHz):  $\delta$  4.14 (m, 1H, -CH <sub>$\alpha$</sub> ), 3.96 (dd, 1H, *J* = 10.2, 4.2 Hz, -CH <sub>$\beta$</sub> ), 3.88 (dd, 1H, *J* = 10.2, 3.9 Hz, -CH <sub>$\beta$</sub> ), 1.44 (s, 9H, -C(CH<sub>3</sub>)<sub>3</sub>), 0.88 (s, 9H, -C(CH<sub>3</sub>)<sub>3</sub>), 0.06 (s, 3H, -CH<sub>3</sub>), 0.05 (s, 3H, -CH<sub>3</sub>); <sup>13</sup>C NMR (CD<sub>3</sub>OD, 125 MHz):  $\delta$  175.5, 157.5, 80.4, 65.1, 58.1, 28.8, 26.4, -5.2; HRMS (ES) Calculated for C<sub>14</sub>H<sub>29</sub>NO<sub>5</sub>SiNa 342.1707, found 342.1712 (M+Na)<sup>+</sup>.

**(2*S*,3*R*)-allyl 2-((*S*)-2-((*tert*-butoxycarbonyl)amino)-3-((*tert*-butyldimethylsilyl)oxy)propanamido)-3-hydroxybutanoate (**10**)**

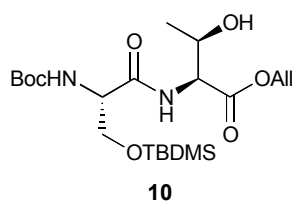

Allyl protected threonine **9** (6.84 g, 20.7 mmol) and **8** (6.00 g, 18.8 mmol) were dissolved in DMF (200 mL) and EDC (4.32 g, 23.0 mmol) and HOBt (3.04 g, 23.0 mmol) were added. The reaction was cooled to 0 °C and DIPEA (8.17 mL, 47.0 mmol) was added. The reaction was allowed to warm to rt and was left to stir for 18 h. Solvent was removed *in vacuo* and the resulting residue was re-dissolved in EtOAc (400 mL) then washed with

10% citric acid (100 mL), 10% NaHCO<sub>3</sub> (100 mL) H<sub>2</sub>O (100 mL) and brine (100 mL). The organic layer was dried over Na<sub>2</sub>SO<sub>4</sub> and then concentrated *in vacuo*. The resulting crude product was purified using flash chromatography (SiO<sub>2</sub>, 3:1 hexanes:EtOAc) to yield **10** (4.47 g, 51.7%) as a pale yellow oil. (*R*<sub>f</sub> 0.31 on SiO<sub>2</sub>, 3:1 hexanes:EtOAc); [ $\alpha$ ]<sub>D</sub><sup>26</sup> 12.54 (*c* 1.0, EtOAc); IR (EtOAc cast) 3356, 2977, 2955, 2931, 2885, 2858, 1745, 1720, 1672, 1523, 1502, 1255, 1171 cm<sup>-1</sup>; <sup>1</sup>H NMR (CDCl<sub>3</sub>, 500 MHz):  $\delta$  7.36-7.18 (m, 1H, -NH), 5.92 (ddt, 1H, *J* = 6.0, 10.5, 17.0 Hz, -OCH<sub>2</sub>CH=CH<sub>2</sub>), 5.42-5.35 (m, 1H, -NH), 5.35 (dd, 1H, *J* = 17.0, 1.5 Hz, -OCH<sub>2</sub>CH=CH<sub>2</sub>), 5.27 (dd, 1H, *J* = 10.5, 1.5 Hz, -OCH<sub>2</sub>CH=CH<sub>2</sub>), 4.69-4.66 (m, 2H, -OCH<sub>2</sub>CH=CH<sub>2</sub>), 4.64 (dd, 1H, *J* = 9.0, 3.0 Hz, Thr-CH<sub>α</sub>), 4.39-4.33 (m, 1H, Thr-CH<sub>β</sub>), 4.27-4.20 (m, 1H, Ser-CH<sub>α</sub>), 4.06 (dd, 1H, *J* = 10.0, 4.0 Hz, Ser-CH<sub>β</sub>), 3.73 (dd, 1H, *J* = 10.0, 6.5 Hz, Ser-CH<sub>β</sub>), 2.38-2.32 (br s, 1H, -OH), 1.48 (s, 9H, -C(CH<sub>3</sub>)<sub>3</sub>), 1.22 (d, 3H, *J* = 6.0 Hz, Thr-CH<sub>3</sub>), 0.91 (s, 9H, Si-C(CH<sub>3</sub>)<sub>3</sub>), 0.11 (s, 6H, Si-CH<sub>3</sub>); <sup>13</sup>C NMR (CDCl<sub>3</sub>, 125 MHz):  $\delta$  171.2, 170.2, 155.5, 131.5, 118.9, 80.2, 68.1, 66.1, 63.2, 57.5, 55.8, 28.3, 25.9, 19.9, 18.3, -5.4, -5.5; HRMS (ES) Calculated for C<sub>21</sub>H<sub>40</sub>N<sub>2</sub>O<sub>7</sub>SiNa 483.2497, found 483.2496 (M+Na)<sup>+</sup>.

**(S)-allyl 2-(2,2,3,3,10,10-hexamethyl-8-oxo-4,9-dioxo-7-aza-3-silaundecan-6-yl)-5-methyloxazole-4-carboxylate (11)**

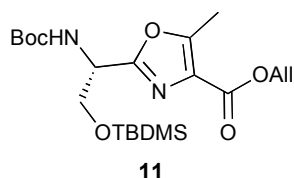

This product was synthesized adapting protocols from a literature source.<sup>6</sup> Dess-Martin periodinane (4.20 g, 9.80 mmol) was added to a solution of **10** (4.30 g, 9.30 mmol) in



CH<sub>2</sub>Cl<sub>2</sub> (100 mL) at 0 °C. After 15 min the reaction was warmed to rt and left to stir for a further 1 h. Et<sub>2</sub>O (50 mL) was added and the solvent was removed *in vacuo*. The residue was re-dissolved in Et<sub>2</sub>O (200 mL) and washed with a solution of 10% Na<sub>2</sub>S<sub>2</sub>O<sub>3</sub> /10% NaHCO<sub>3</sub> (100 mL) followed by H<sub>2</sub>O (100 mL) and brine (100 mL). The aqueous layers were back extracted into Et<sub>2</sub>O (3 × 75 mL) and then the organic layer was washed with H<sub>2</sub>O (50 mL) and brine (50 mL). The organic layers were combined and dried over Na<sub>2</sub>SO<sub>4</sub>. Solvent was removed *in vacuo* and the residue was dissolved in CH<sub>2</sub>Cl<sub>2</sub> (75 mL) and was added drop-wise to a solution of triphenylphosphine (4.90 g, 18.7 mmol), I<sub>2</sub> (4.74 g, 18.7 mmol) and Et<sub>3</sub>N (5.20 mL, 37.4 mmol) in CH<sub>2</sub>Cl<sub>2</sub> (75 mL). The reaction was stirred for 30 min and was then concentrated *in vacuo*. The resulting residue was dissolved in diethyl ether (250 mL) and was washed with 10% Na<sub>2</sub>S<sub>2</sub>O<sub>3</sub> (100 mL), 10% NaHCO<sub>3</sub> (100 mL), H<sub>2</sub>O (100 mL) and brine (100 mL). The organic layer was dried over Na<sub>2</sub>SO<sub>4</sub> and concentrated *in vacuo*. The resulting crude product was purified using flash chromatography (SiO<sub>2</sub>, 4:1 hexanes:EtOAc) to yield **11** (2.80 g, 68.3%) as a pale yellow oil. (R<sub>f</sub> 0.67 on SiO<sub>2</sub>, 3:1 hexanes:EtOAc); [α]<sub>D</sub><sup>26</sup> -15.46 (*c* 0.45, CH<sub>2</sub>Cl<sub>2</sub>); IR (CH<sub>2</sub>Cl<sub>2</sub> cast) 3446, 3356, 2955, 2931, 2885, 2858, 1719, 1502, 1254, 1175, 1099 cm<sup>-1</sup>; <sup>1</sup>H NMR (CDCl<sub>3</sub>, 400 MHz): δ 5.99 (ddt, 1H, *J* = 17.2, 10.4, 5.6 Hz, -OCH<sub>2</sub>CH=CH<sub>2</sub>), 5.49 (d, 1H, *J* = 7.6 Hz, -NH), 5.36 (dq, 1H, *J* = 17.2, 1.6 Hz, -OCH<sub>2</sub>CH=CH<sub>2</sub>), 5.26 (dq, 1H, *J* = 10.4, 1.6 Hz, -OCH<sub>2</sub>CH=CH<sub>2</sub>), 4.96-4.88 (m, 1H, -CH<sub>α</sub>), 4.83-4.78 (m, 2H, -OCH<sub>2</sub>CH=CH<sub>2</sub>), 4.00 (dd, 1H, *J* = 10.4, 4.0 Hz, -CH<sub>β</sub>), 3.38 (dd, 1H, *J* = 10.4, 4.4 Hz, -CH<sub>β</sub>), 2.58 (s, 3H, -CH<sub>3</sub>), 1.43 (s, 9H, -C(CH<sub>3</sub>)<sub>3</sub>), 0.80 (s, 9H, Si-C(CH<sub>3</sub>)<sub>3</sub>), -0.03 (s, 3H, Si-CH<sub>3</sub>), -0.05 (s, 3H, Si-CH<sub>3</sub>); <sup>13</sup>C NMR (CDCl<sub>3</sub>, 125 MHz): δ 161.9, 160.8, 156.5,

155.1, 132.0, 127.5, 118.7, 80.1, 65.5, 64.5, 51.0, 28.3, 25.6, 18.1, 12.0, -5.6; HRMS

(ES) Calculated for  $C_{21}H_{37}N_2O_6Si$  441.2415, found 441.2414 ( $M+H$ )<sup>+</sup>.

**(S)-allyl 2-(1-((*tert*-butoxycarbonyl)amino)-2-hydroxyethyl)-5-methyloxazole-4-carboxylate (12)**

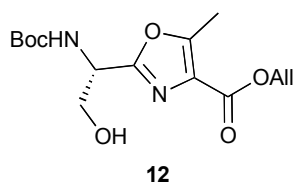

1 M Tetra-*n*-butylammonium fluoride in THF (14.5 mL, 14.5 mmol) was added to a solution of **11** (2.13 g, 4.80 mmol) in THF (200 mL) at 0 °C. The reaction was left to stir for 2.5 h whilst slowly warming to rt. Solvent was removed *in vacuo* and the resulting crude product was purified using flash chromatography (SiO<sub>2</sub>, 1:1 hexanes:EtOAc) to yield **12** (1.36 g, 86.2%) as a colourless oil. (*R*<sub>f</sub> 0.37 on SiO<sub>2</sub>, 1:1 hexanes:EtOAc); [ $\alpha$ ]<sub>D</sub><sup>26</sup> -36.9 (*c* 1.0, CH<sub>2</sub>Cl<sub>2</sub>); IR (CH<sub>2</sub>Cl<sub>2</sub> cast) 3449, 2978, 2934, 1718, 1620, 1518, 1171 cm<sup>-1</sup>; <sup>1</sup>H NMR (CDCl<sub>3</sub>, 400 MHz):  $\delta$  5.99 (ddt, 1H, *J* = 17.2, 10.4, 6.0 Hz, -OCH<sub>2</sub>CH=CH<sub>2</sub>), 5.72 (d, 1H, *J* = 7.6 Hz, -NH), 5.38 (dq, 1H, *J* = 16.8, 1.2 Hz, -OCH<sub>2</sub>CH=CH<sub>2</sub>), 5.28 (dq, 1H, *J* = 10.4, 1.2 Hz, -OCH<sub>2</sub>CH=CH<sub>2</sub>), 4.99-4.88 (m, 1H, -CH<sub>α</sub>), 4.82-4.77 (m, 2H, -OCH<sub>2</sub>CH=CH<sub>2</sub>), 4.07 (dd, 1H, *J* = 11.2, 4.0 Hz, -CH<sub>β</sub>), 3.93 (dd, 1H, *J* = 11.2, 4.0 Hz, -CH<sub>β</sub>), 3.41-3.01 (br s, 1H, -OH), 2.60 (s, 3H, -CH<sub>3</sub>), 1.43 (s, 9H, -C(CH<sub>3</sub>)<sub>3</sub>); <sup>13</sup>C NMR (CDCl<sub>3</sub>, 100 MHz):  $\delta$  161.9, 160.9, 157.1, 155.7, 132.0, 127.5, 119.2, 80.6, 65.9, 63.9, 50.8, 28.5, 20.7, 12.4; HRMS (ES) Calculated for C<sub>15</sub>H<sub>22</sub>N<sub>2</sub>O<sub>6</sub>Na 349.1370, found 349.1364 ( $M+Na$ )<sup>+</sup>.

**allyl 2-(1-((*tert*-butoxycarbonyl)amino)vinyl)-5-methyloxazole-4-carboxylate (13)**

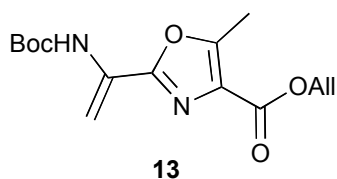

Et<sub>3</sub>N (0.69 mL, 4.96 mmol) was added to a solution of **12** (0.62 g, 1.99 mmol) in CH<sub>2</sub>Cl<sub>2</sub> (50 mL) at 0 °C. After 10 min, methanesulfonyl chloride (0.31 mL, 3.97 mmol) was added and after a further 30 min it was allowed to warm to rt. Solvent was removed *in vacuo* after 1 h and the resulting residue was dissolved in DCE (50 mL). DBU (0.89 mL, 5.95 mmol) was added and the reaction was heated to reflux for 18 h. Solvent was removed *in vacuo* and the resulting crude product was purified using flash chromatography (SiO<sub>2</sub>, 5:1 hexanes:EtOAc) to yield **13** (0.42 g, 72.2%) as a yellow oil. (*R<sub>f</sub>* 0.94 on SiO<sub>2</sub>, 2:1 hexanes:EtOAc); IR (CH<sub>2</sub>Cl<sub>2</sub> cast) 3411, 2980, 2934, 1785, 1723, 1616, 1510, 1160 cm<sup>-1</sup>; <sup>1</sup>H NMR (CDCl<sub>3</sub>, 400 MHz): δ 7.25 (s, 1H, -C=CHH), 6.07 (s, 1H, -NH), 6.03 (ddt, 1H, *J* = 17.2, 10.8, 6.0 Hz, -OCH<sub>2</sub>CH=CH<sub>2</sub>), 5.53-5.50 (m, 1H, -C=CHH), 5.41 (dq, 1H, *J* = 17.2, 1.6 Hz, -OCH<sub>2</sub>CH=CH<sub>2</sub>), 5.31 (dd, 1H, *J* = 10.4, 1.2 Hz, -OCH<sub>2</sub>CH=CH<sub>2</sub>), 4.87-4.82 (m, 2H, -OCH<sub>2</sub>CH=CH<sub>2</sub>), 2.65 (s, 3H, -CH<sub>3</sub>), 1.49 (s, 9H, -C(CH<sub>3</sub>)<sub>3</sub>); <sup>13</sup>C NMR (CDCl<sub>3</sub>, 100 MHz): δ 161.9, 157.5, 156.7, 152.9, 132.0, 128.6, 128.3, 119.4, 100.0, 81.1, 66.1, 28.5, 12.6; HRMS (ES) Calculated for C<sub>15</sub>H<sub>21</sub>N<sub>2</sub>O<sub>5</sub> 309.1445, found 309.1443 (M+H)<sup>+</sup>.

**2-((tert-butoxycarbonyl)amino)vinyl)-5-methyloxazole-4-carboxylic acid (14)**

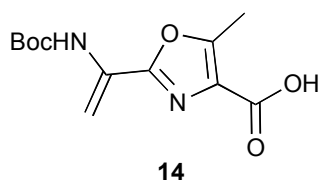

PhSiH<sub>3</sub> (0.20 mL, 1.60 mmol) was added to a stirred solution of **13** (0.25 g, 0.82 mmol) in degassed CH<sub>2</sub>Cl<sub>2</sub> (100 mL). Pd(PPh<sub>3</sub>)<sub>4</sub> (0.100 g, 0.080 mmol) was added to the mixture and the reaction was stirred in the absence of light for 1.5 h. The solvent was removed *in vacuo* and the resulting crude product was purified using flash chromatography (SiO<sub>2</sub>, 40:1:0.1 CH<sub>2</sub>Cl<sub>2</sub>:MeOH:Acetic acid) to yield **14** (0.60 g, 27.5%) as a pale orange solid. (*R<sub>f</sub>* 0.13 on SiO<sub>2</sub>, 2:1 hexanes:EtOAc); IR (CH<sub>2</sub>Cl<sub>2</sub> cast) 3395, 3058, 2979, 2930, 2852, 1781, 1724, 1504, 1160 cm<sup>-1</sup>; <sup>1</sup>H NMR (CDCl<sub>3</sub>, 500 MHz): δ 10.25-9.47 (br s, 1H, -OH), 7.30 (s, 1H, -NH), 6.03 (s, 1H, -C=CHH), 5.48 (s, 1H, -C=CHH), 2.62 (s, 3H, -CH<sub>3</sub>), 1.46 (s, 9H, -C(CH<sub>3</sub>)<sub>3</sub>); <sup>13</sup>C NMR (CDCl<sub>3</sub>, 100 MHz): δ 164.9, 157.7, 155.1, 151.2, 126.7, 126.0, 98.8, 79.4, 26.7, 10.9; HRMS (ES) Calculated for C<sub>12</sub>H<sub>16</sub>N<sub>2</sub>O<sub>5</sub>Na 291.0951, found 291.0951 (M+Na)<sup>+</sup>.

**Scheme 10. Synthesis of oxazole lactocin S analogue (5)**

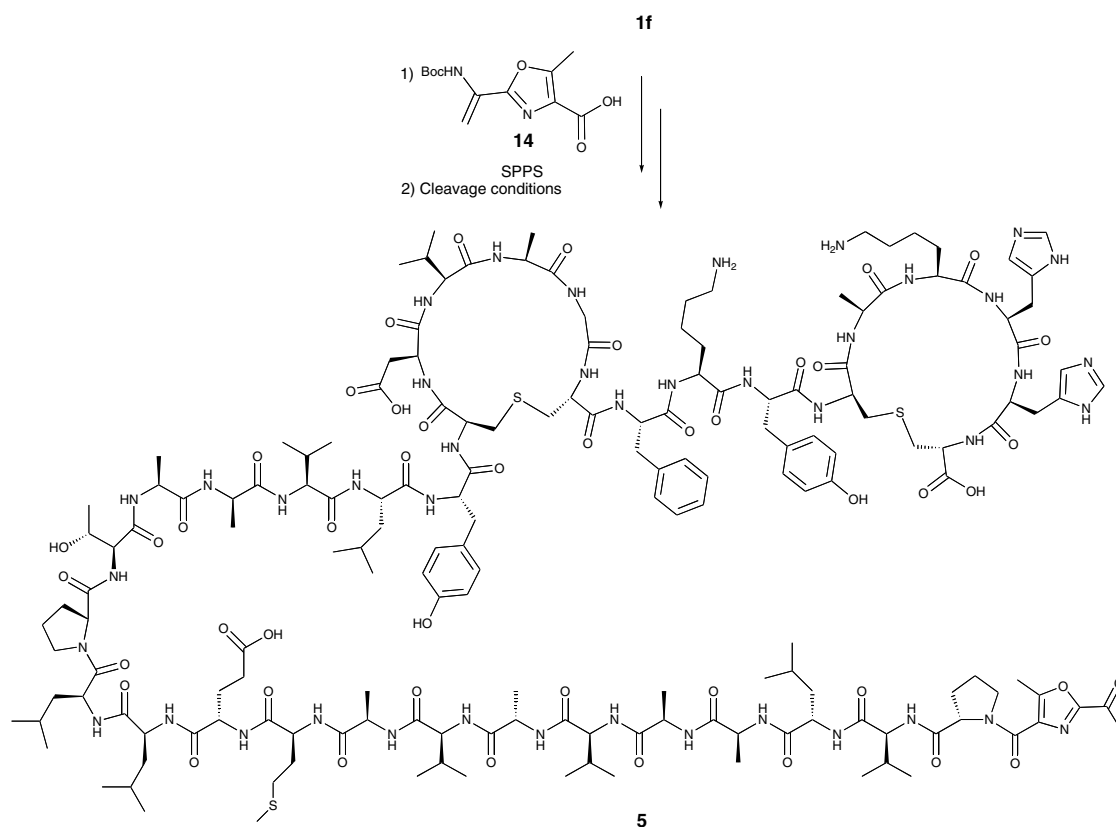

The N-terminal oxazole ‘di-peptide’ derivative **14** was coupled to the Fmoc deprotected 3-37 lactocin S fragment using standard solid phase methodology. Quantitatively, a pre-activated solution of the oxazole (25 mg, 0.093 mmol), PyBOP (48 mg, 0.091 mmol), HOBt (13 mg, 0.093 mmol), and NMM (12.3  $\mu$ L, 0.11 mmol) in DMF (10 mL) was added and bubbled with argon for 3 hours. After rinsing with DMF, a second 3 hour coupling was subsequently performed with a similarly pre-activated solution of the oxazole in DMF (10 mL). The peptide was then cleaved from the resin yielding crude peptide (5.0 mg) and was purified as described previously to give 0.33 mg of product (overall yield = 0.3%) as a fluffy white solid. Monoisotopic MW calculated for  $C_{173}H_{263}N_{42}O_{46}S_3$  3760.8694, found *high resolution* (FTICR-ESI-MS) 3760.8648 ( $M+H$ )<sup>+</sup>.

**Crude HPLC purification traces of Lactocin S analogues (arrows indicate analogue elution peaks, see S11-S12 for HPLC method information)**

**Leu-12 lactocin S (2)**

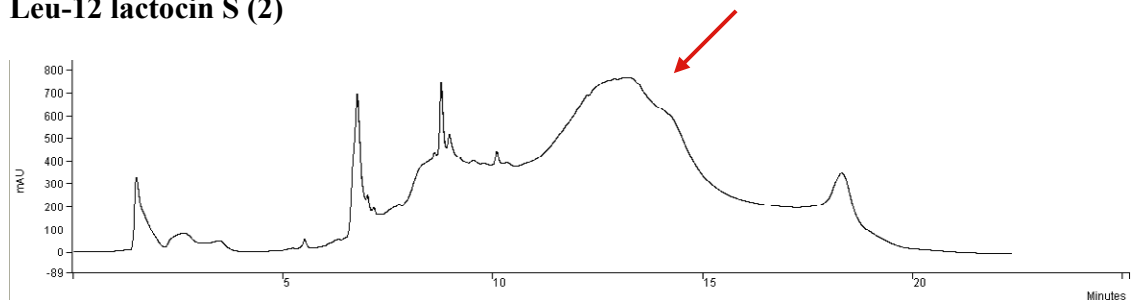

**Nle-12 lactocin S (3)**

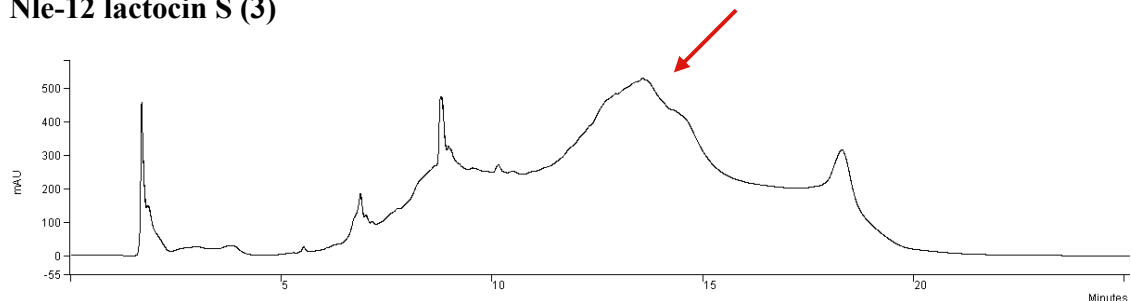

**NleDAP lactocin S (4)**

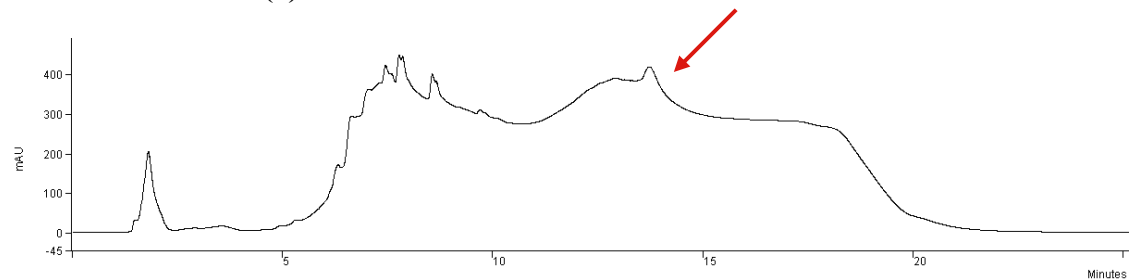

**Oxazole lactocin S (5)**

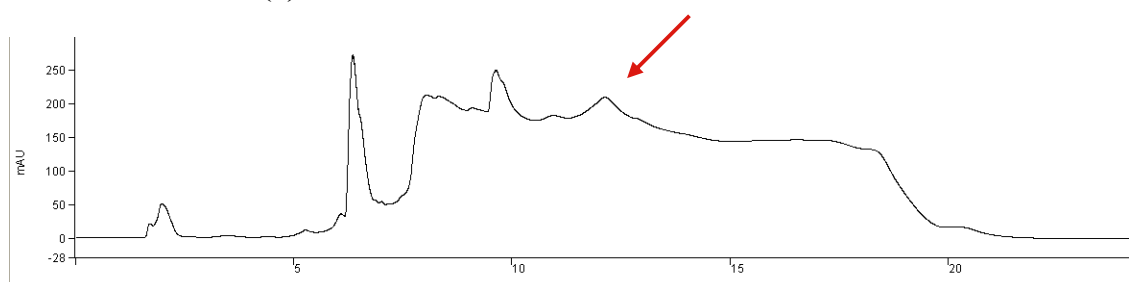

**Reinjected HPLC traces of 100  $\mu$ L of purified lactocin S analogue solutions (200  $\mu$ M concentrations)**

**Milli-Q water injection (blank)**

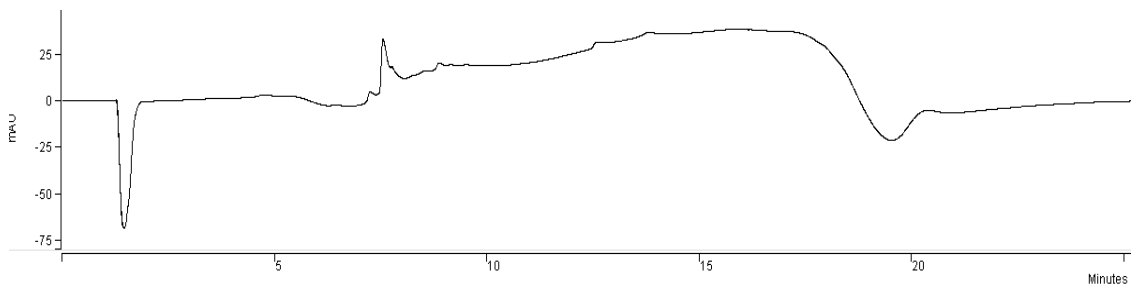

**Leu-12 lactocin S (2)**

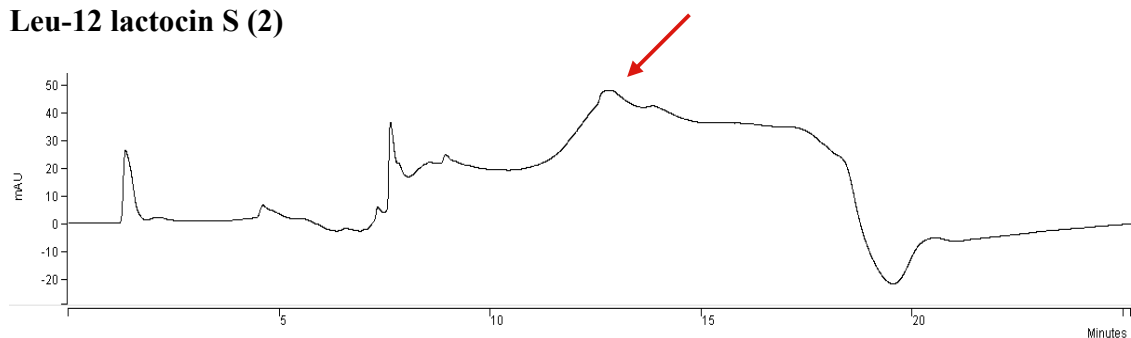

**Nle-12 lactocin S (3)**

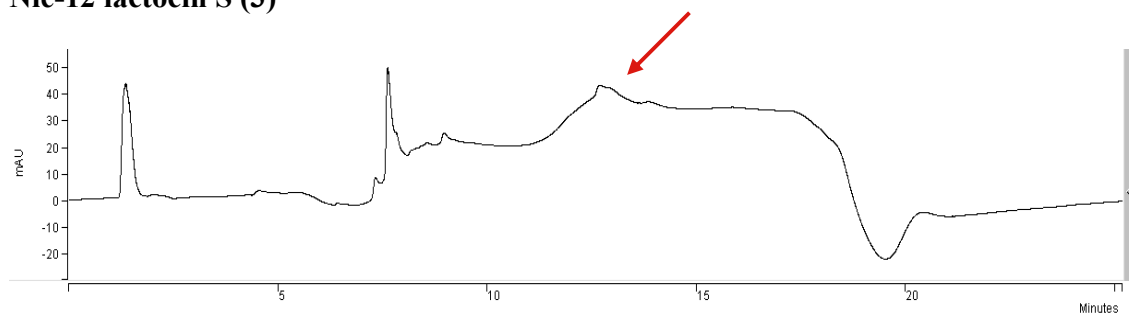

**NleDAP lactocin S (4)**

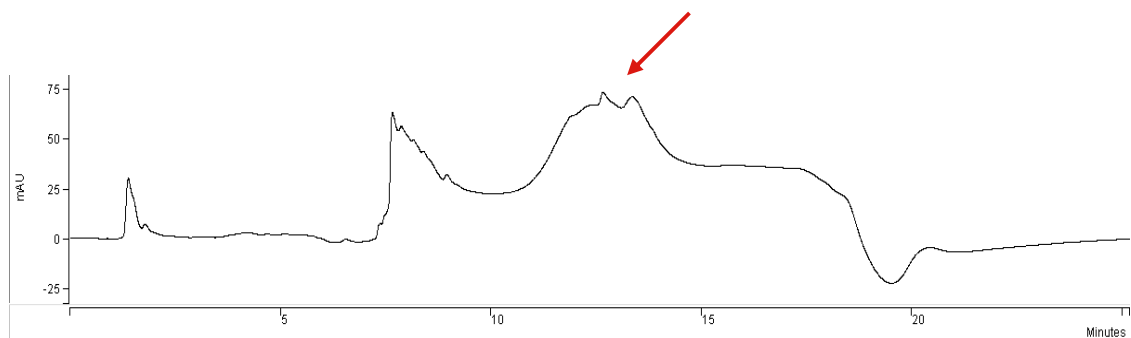

**Oxazole lactocin S (5)**

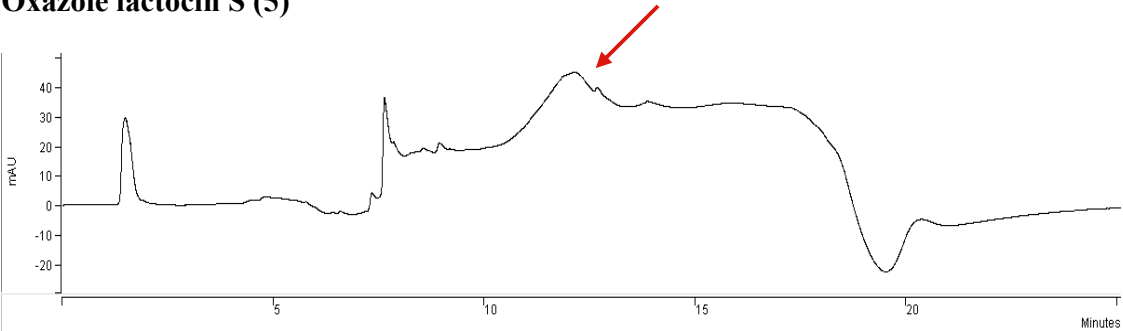



## **Biological Testing**

### **Spot-on-lawn Activity Monitoring**

Anti-bacterial activity was assayed using spot-on-lawn activity assays. Plates containing 10 mL of MRS hard agar (1.5% agar, Difco) were used for spot-on-lawn assays. MRS soft agar overlays (0.75% agar) were prepared by adding 27.5 g/L MRS broth (Difco) with 35 g/L MRS agar (Difco). Lyophilized peptide samples were dissolved in 9:1 MQ-H<sub>2</sub>O/MeOH (0.1% TFA) for activity testing. 10 µL aliquots of samples being analyzed for activity were spotted onto a hard MRS agar plate and permitted to dry. 10 mL of molten soft MRS agar was inoculated with 100 µL of the desired organism (1% inoculation) and poured over the hard agar plate and allowed to solidify. Plates were sealed with Parafilm and incubated overnight at the optimal temperature for the organism being examined (30 or 37 °C). Activity was measured as zones of inhibited growth.

### **Serial Dilution Assay**

Solutions of peptide analogues were made in 9:1 MQ-H<sub>2</sub>O/MeOH (0.1 % TFA) to yield initial concentrations of 200 µM. Serial dilutions were performed with 9:1 MQ-H<sub>2</sub>O/MeOH (0.1 % TFA) to make 100 µM, 50 µM, 20 or 25 µM, 10 µM and 5 µM solutions. All solutions had 1.5 mg/L TCEP added to them to minimize oxidation of peptides due to atmospheric oxygen. Spot on lawn assays were used to test the biological activity of the diluted peptides as described above. Solutions of natural lactocin S and 9:1 MQ-H<sub>2</sub>O/MeOH (0.1 % TFA with 1.5 mg/L TCEP added) were spotted on activity plates to serve as positive and negative controls respectively. Activity was measured as zones of inhibited growth.

Table 1. Organisms used for activity testing

| Indicator species                              | Strain  | Growth medium | Growth temperature |
|------------------------------------------------|---------|---------------|--------------------|
| <i>Lactobacillus bulgaricus</i>                | 11842   | MRS           | 37 °C              |
| <i>Lactobacillus helveticus</i>                | 18009   | MRS           | 37 °C              |
| <i>Lactobacillus sakei</i> (producer organism) | L45     | MRS           | 30 °C              |
| <i>Pediococcus acidilactici</i>                | Pac 1.0 | MRS           | 30 °C              |
| <i>Pediococcus pentosaceus</i>                 | FBF63   | MRS           | 37 °C              |

Figure 1. *Pediococcus acidilactici* Pac 1.0

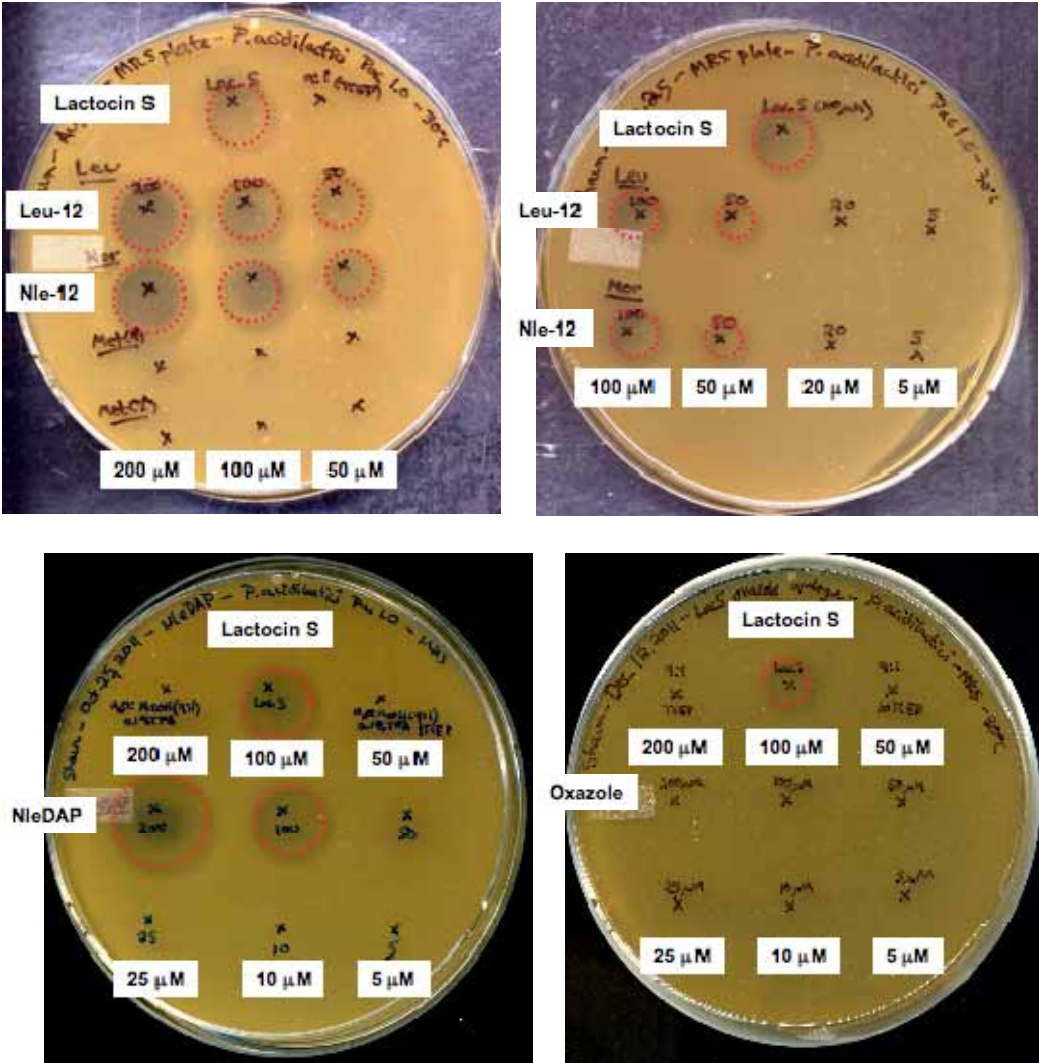

Figure 2. *Lactobacillus bulgaricus* 11842

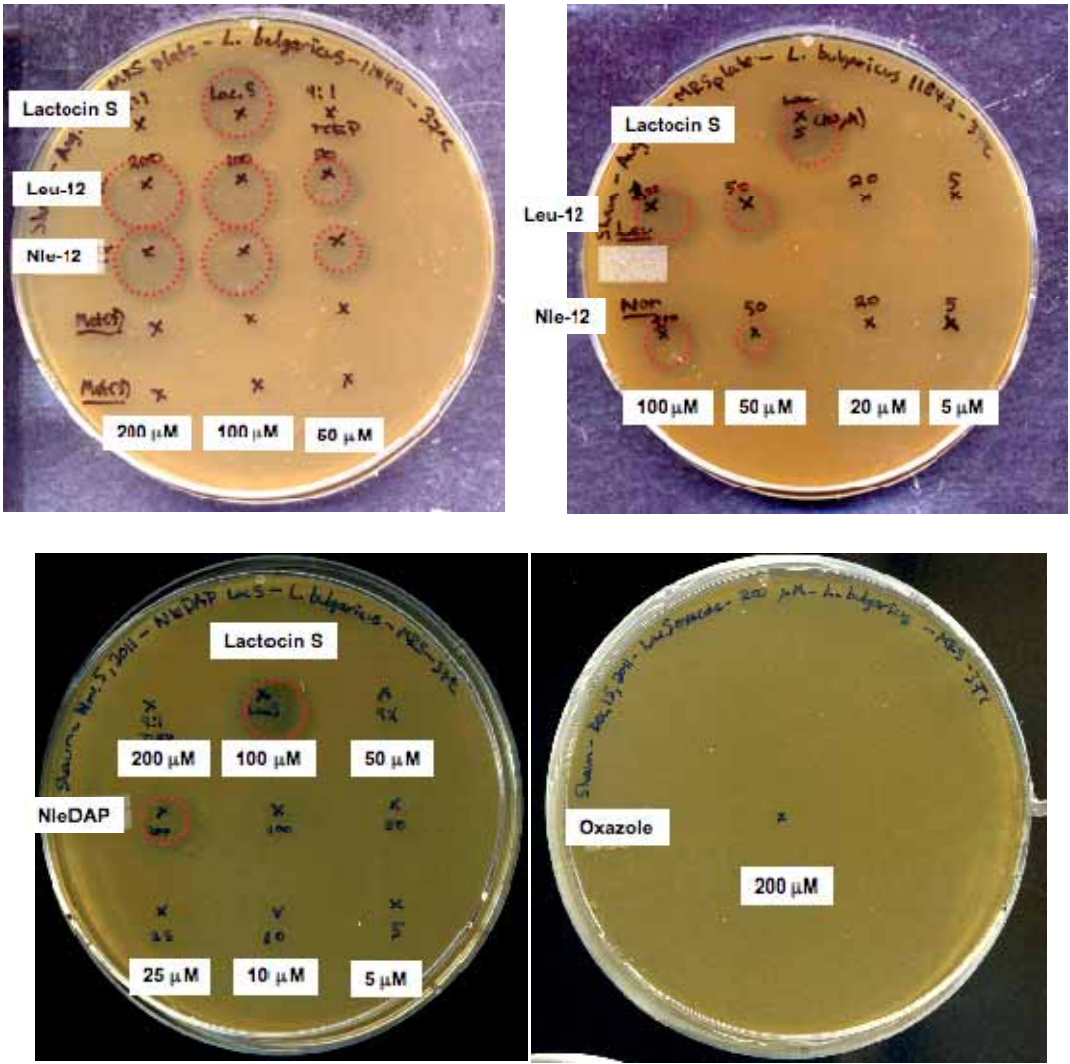

Figure 3. *Lactobacillus sakei* L45

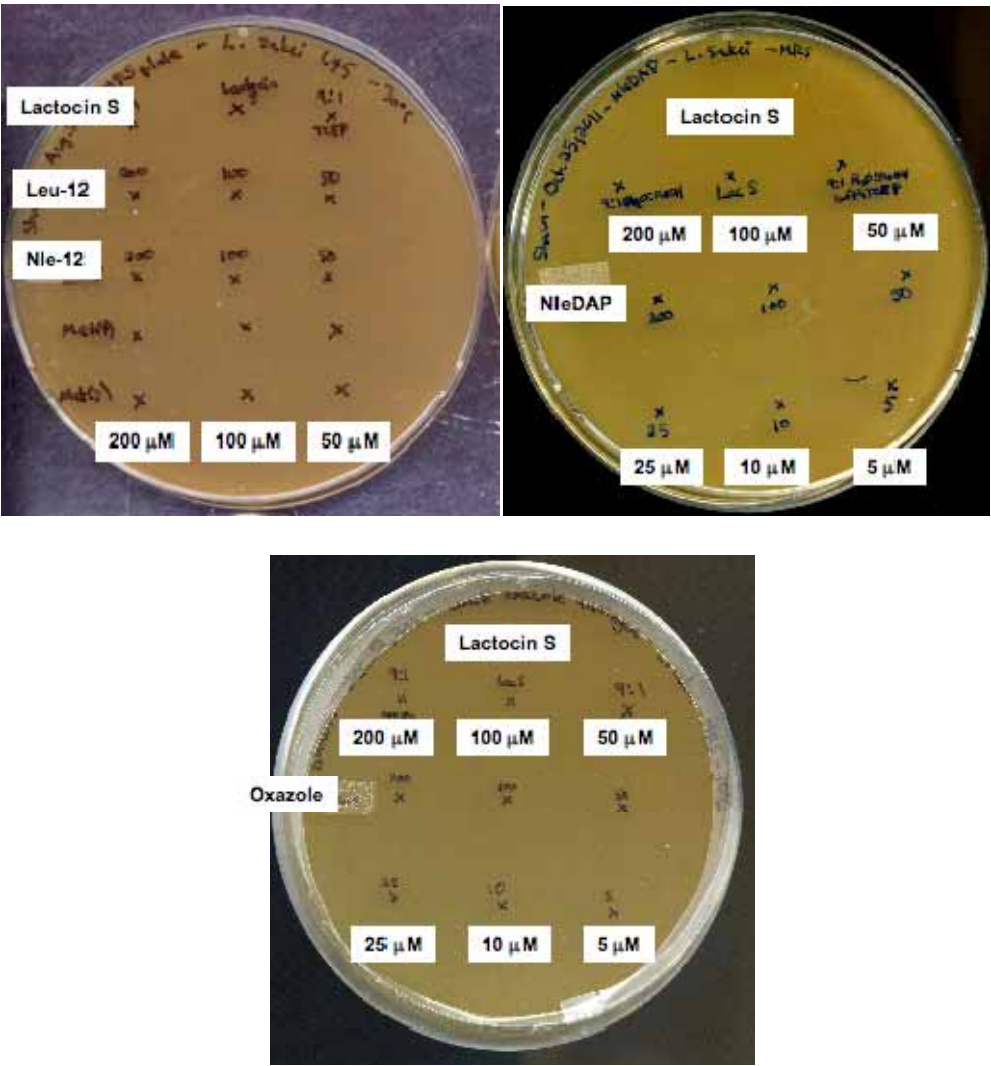



Figure 4. *Pediococcus pentosaceus* FBB63

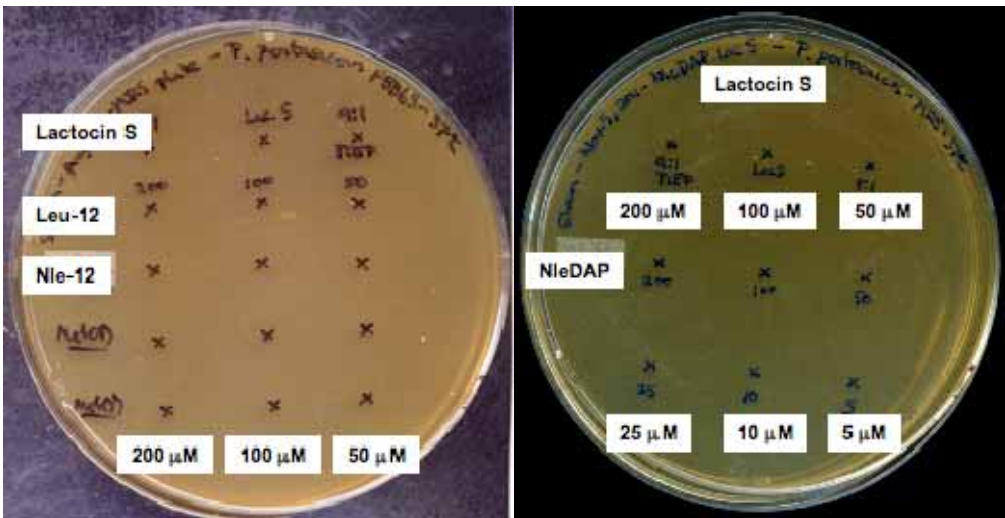

Figure 5. *Lactobacillus helveticus* 18009

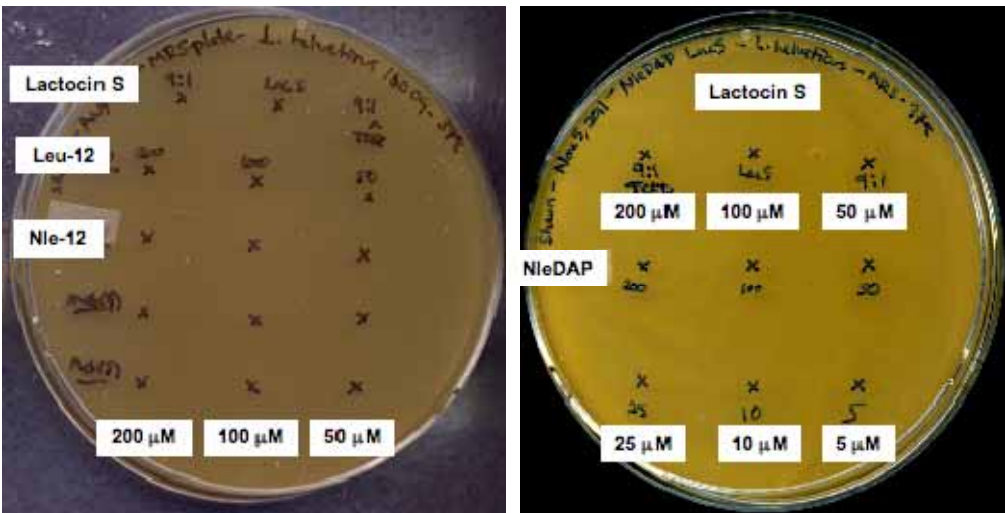

### Oxidative Stability Assay of lactocin S analogues versus lactocin S

100  $\mu$ M solutions (in 9:1 MQ-H<sub>2</sub>O:MeOH with 0.1% TFA and 1.5 mg/L TCEP) of lactocin S and the peptide analogues Leu-12, Nle-12, NleDAP, and oxazole lactocin S were prepared and placed under a sealed atmosphere of oxygen for 6 hours at room temperature (the containers were sealed to prevent evaporation of solvent from artificially concentrating samples). The activity of peptide solutions was compared to solutions maintained under an atmosphere of argon (0 h O<sub>2</sub> exposure) by using spot on lawn assays against sensitive bacterial strains *P. acidilactici* Pac 1.0 and *L. bulgaricus* 11842 as described above.

**Figure 6. Lactocin S and peptide analogues tested against *P. acidilactici* Pac 1.0 (left) and *L. bulgaricus* 11842 (right) before and after 6 h exposure to oxygen gas. Red circles indicate zones of inhibited growth.**

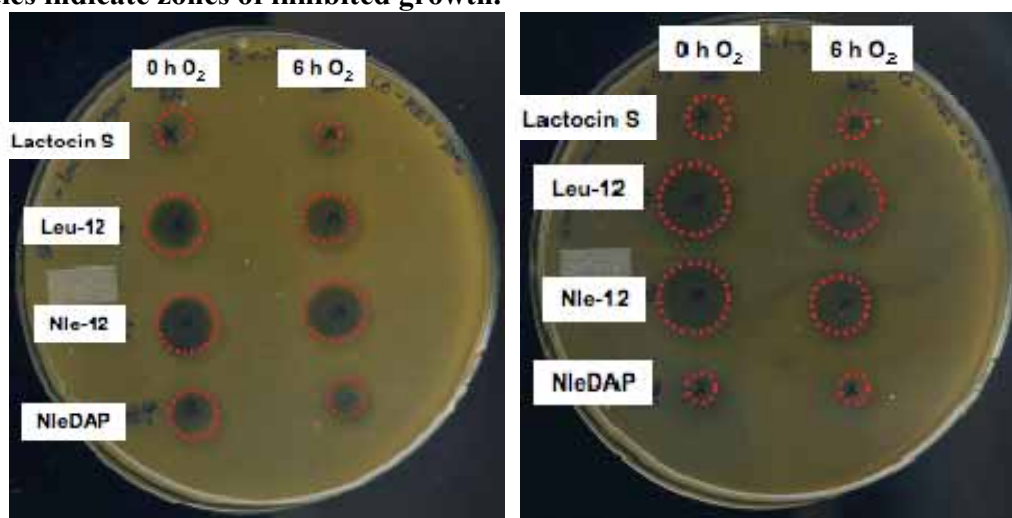

## MS/MS Analysis

The sequences of the peptide analogues were confirmed by tandem MS/MS. Individual amino acid residues responsible for the changes in masses are noted in red above the spectra.

### MS/MS Spectrum for Leu-12 lactocin S (2)

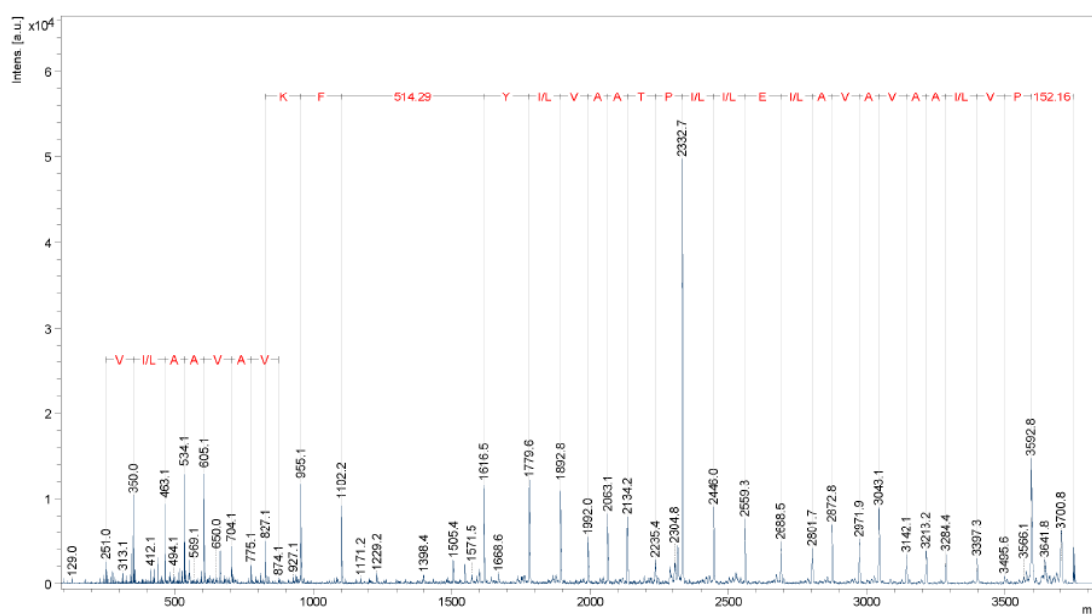

MS/MS Spectrum for Nle-12 lactocin S (3)

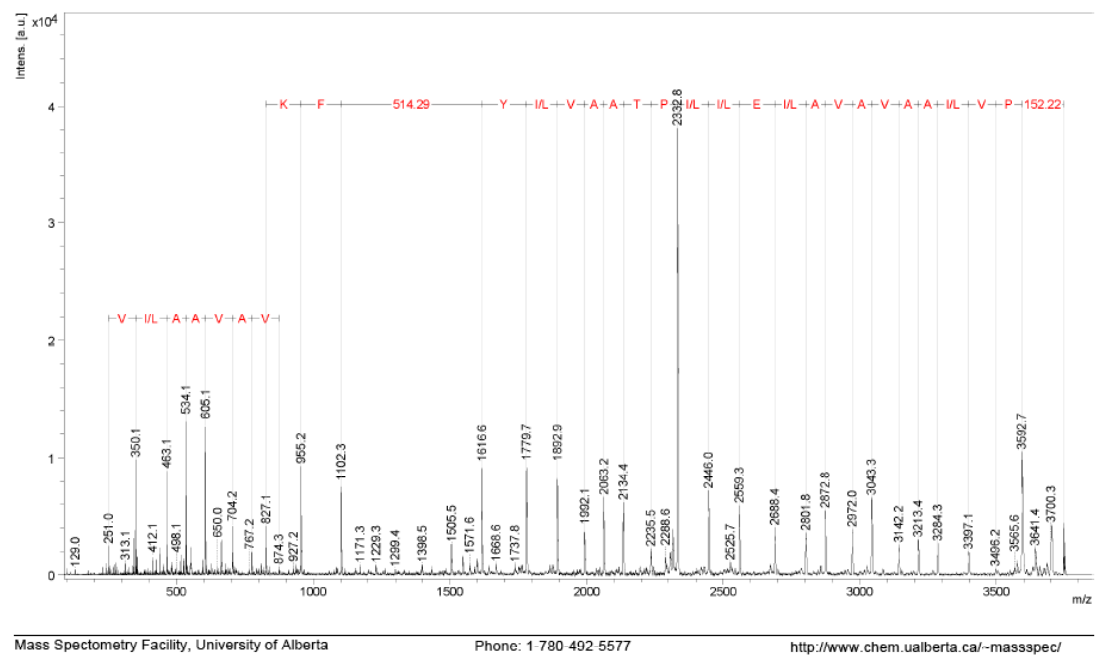

MS/MS spectrum for NleDAP lactocin S (4)

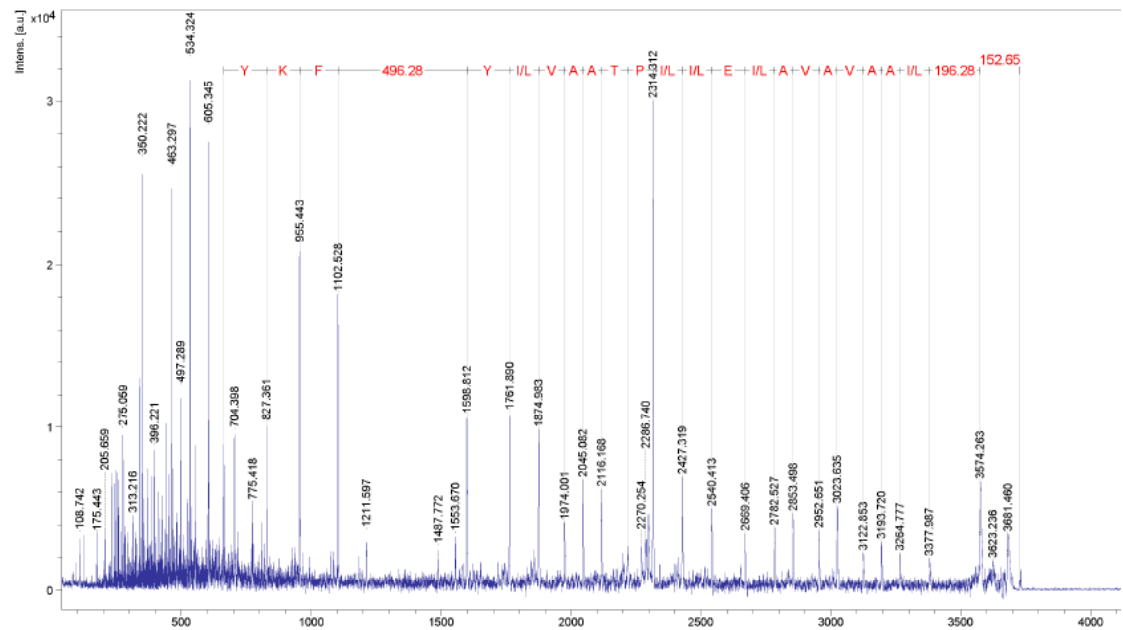



MS/MS spectrum for oxazole lactocin S (5)

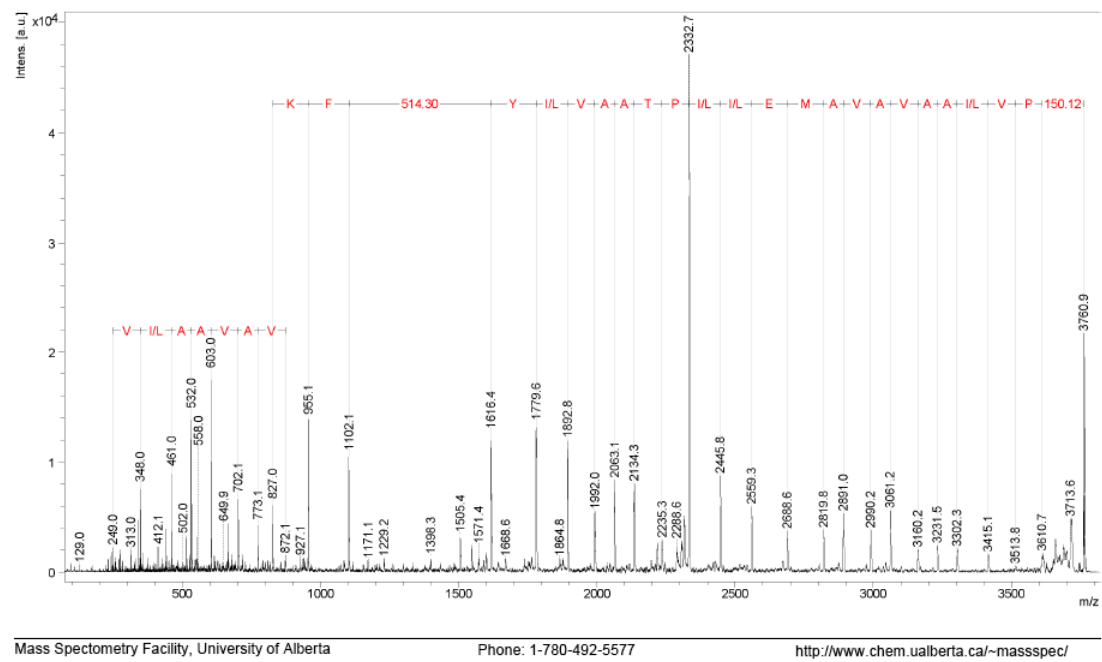

High Resolution Mass Spectrometry Analysis of Leu-12 Lactocin S (2)

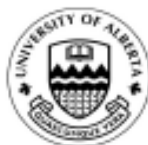

Mass Spectrometry Facility Department of Chemistry

Analysis Info

Analysis Name: X:\Aug11\110890\_0\_D8\_000002.d

Method: MALDI\_HCCA\_2k\_new

Sample Name: MUL-61-Leu

Comment: Shaun McKinnle, HCCA as matrix, 9.4T FTICR

Acquisition Date: 8/30/2011 4:17:45 PM

Instrument: apex-Qe

Operator:

| Acquisition Parameter                |  |                  |  |             |  |     |  |                         |  |       |  |
|--------------------------------------|--|------------------|--|-------------|--|-----|--|-------------------------|--|-------|--|
| Ionisation Mode:                     |  | Positive         |  | MALDI Mode: |  | n/a |  |                         |  |       |  |
| Generate Molecular Formula Parameter |  |                  |  |             |  |     |  |                         |  |       |  |
| Formula, min.:                       |  | C173             |  |             |  |     |  |                         |  |       |  |
| Formula, max.:                       |  | C175H300N43O46S3 |  |             |  |     |  |                         |  |       |  |
| Measured m/z:                        |  | 3744.93          |  | Charge:     |  | 1   |  | Tolerance:              |  | 2 ppm |  |
| Check Valence:                       |  | no               |  | Min.:       |  | 0   |  | Max.:                   |  | 0     |  |
| Nitrogen Rule:                       |  | no               |  |             |  |     |  |                         |  |       |  |
| Filter H/C Ratio:                    |  | no               |  | Min.:       |  | 0   |  | Max.:                   |  | 3     |  |
| Estimate # of C:                     |  | yes              |  |             |  |     |  | Electron Configuration: |  | even  |  |

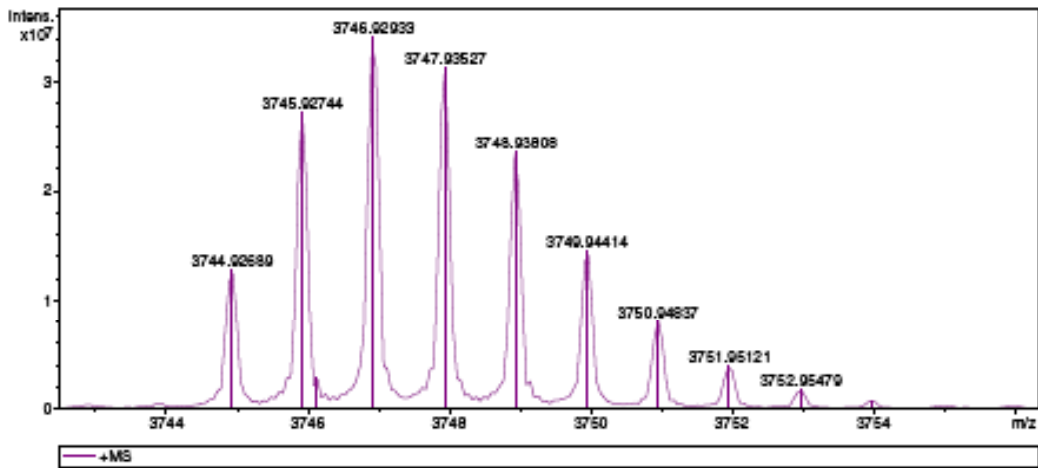

| Sum Formula               | Sigma | m/z        | Err [ppm] | Mean Err [ppm] | Err [mDa] | rdB   | N Rule | e <sup>-</sup> |
|---------------------------|-------|------------|-----------|----------------|-----------|-------|--------|----------------|
| C 174 H 267 N 42 O 46 S 2 | 0.104 | 3744.92806 | 0.31      | 0.26           | 1.17      | 62.50 | ok     | even           |

## High Resolution Mass Spectrometry Analysis of Nle-12 Lactocin S (3)

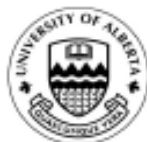

### Mass Spectrometry Facility Department of Chemistry

#### Analysis Info

Analysis Name: X:\Aug11\110830\_0\_D13\_000003.d  
Method: MALDI\_HCCA\_2k\_new  
Sample Name: MUL-63 Nle Peak 2  
Comment: Shaun McKinnle, HCCA as matrix, 9.4T FTICR

Acquisition Date: 8/30/2011 4:39:18 PM

Instrument: apex-Qe

Operator:

#### Acquisition Parameter

Ionisation Mode: Positive MALDI Mode: n/a

#### Generate Molecular Formula Parameter

Formula, min.: C174  
Formula, max.: C175H300N43O46S3  
Measured m/z: 3744.93 Charge: 1 Tolerance: 2 ppm  
Check Valence: no Min.: 0 Max.: 0  
Nitrogen Rule: no  
Filter H/C Ratio: no Min.: 0 Max.: 3  
Estimate # of C: yes Electron Configuration: even

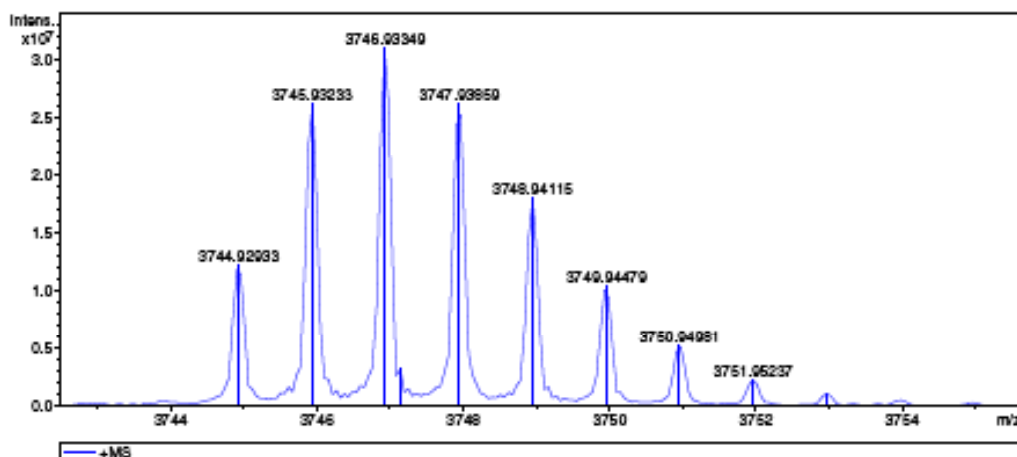

| Sum Formula               | Sigma | m/z        | Err (ppm) | Mean Err (ppm) | Err (mDa) | rdB   | N Rule | e <sup>-</sup> |
|---------------------------|-------|------------|-----------|----------------|-----------|-------|--------|----------------|
| C 174 H 267 N 42 O 46 S 2 | 0.042 | 3744.92906 | -0.34     | -0.60          | -1.27     | 62.50 | ok     | even           |

## High Resolution Mass Spectrometry Analysis of NleDAP Lactocin S (4)

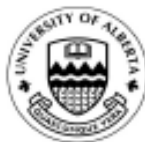

### Mass Spectrometry Facility Department of Chemistry

#### Analysis Info

Analysis Name: X:\Oct11\111019\_0\_H21\_000001.d  
Method: MALDI-HCCA\_2k\_new  
Sample Name: Shaun LacS NleDAP  
Comment: Shaun McKinnle, HCCA as matrix, 9.4T FTICR

Acquisition Date: 10/19/2011 10:55:13 AM  
Instrument: apex-Qe  
Operator:

#### Acquisition Parameter

Ionisation Mode: Positive MALDI Mode: n/a

#### Generate Molecular Formula Parameter

Formula, min.: C174  
Formula, max.: C175H300N42O46S  
Measured m/z: 3726.97 Charge: 1 Tolerance: 2 ppm  
Check Valence: no Min.: 0 Max.: 0  
Nitrogen Rule: no Min.: 0 Max.: 3  
Filter H/C Ratio: no  
Estimate # of C: yes Electron Configuration: even

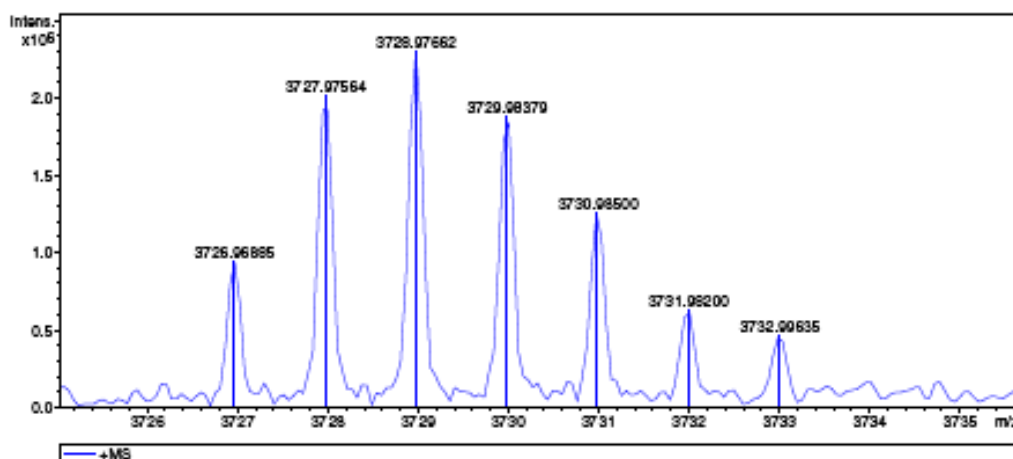

| Sum Formula      | Sigma | m/z        | Err (ppm) | Mean Err (ppm) | Err (mDa) | rdB   | N Rule | e <sup>-</sup> |
|------------------|-------|------------|-----------|----------------|-----------|-------|--------|----------------|
| C175H269N42O46S1 | 0.047 | 3726.97164 | 0.75      | -0.35          | 2.70      | 62.50 | ok     | even           |

## High Resolution Mass Spectrometry Analysis of Oxazole Lactocin S (5)

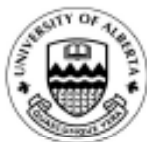

### Mass Spectrometry Facility Department of Chemistry

#### Analysis Info

Analysis Name: X:\Aug11\110830\_0\_D4\_000001.d  
Method: MALDI\_HCCA\_2k\_new  
Sample Name: Lac S oxazole  
Comment: Shaun McKinnle, HCCA as matrix, 9.4T FTICR

Acquisition Date: 8/30/2011 4:06:13 PM  
Instrument: apex-Qe  
Operator:

#### Acquisition Parameter

Ionisation Mode: Positive MALDI Mode: n/a

#### Generate Molecular Formula Parameter

Formula, min.: C168  
Formula, max.: C175H300N43O46S3  
Measured m/z: 3760.86 Charge: 1 Tolerance: 2 ppm  
Check Valence: no Min.: 0 Max.: 0  
Nitrogen Rule: no  
Filter H/C Ratio: no Min.: 0 Max.: 3  
Estimate # of C: yes Electron Configuration: even

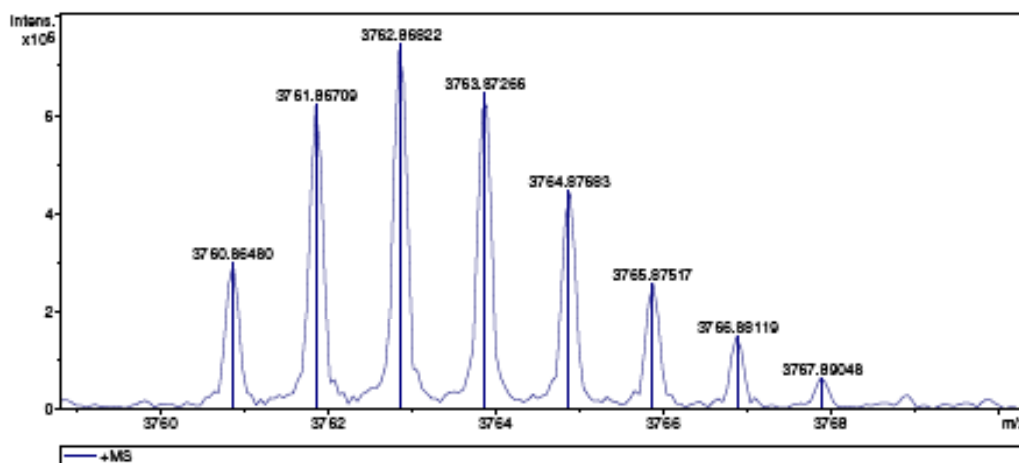

| Sum Formula               | Sigma | m/z        | Err [ppm] | Mean Err [ppm] | Err [mDa] | ndb   | N Rule | e <sup>-</sup> |
|---------------------------|-------|------------|-----------|----------------|-----------|-------|--------|----------------|
| C 173 H 263 N 42 O 46 S 3 | 0.038 | 3760.86893 | 1.07      | 0.97           | 4.02      | 63.50 | ok     | even           |



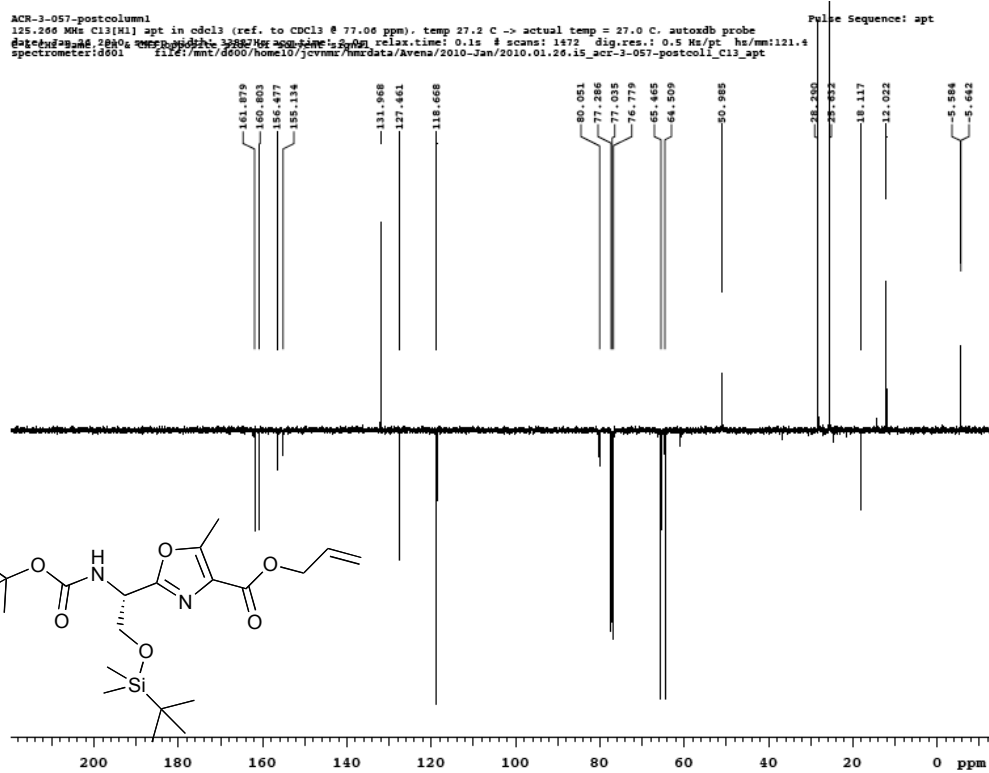

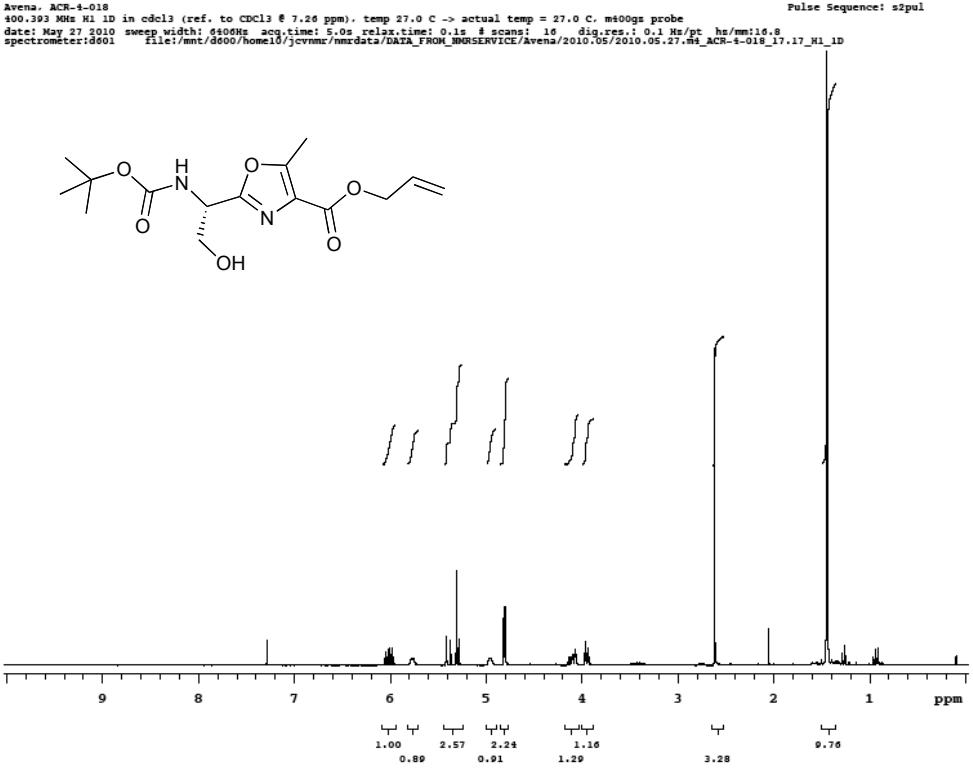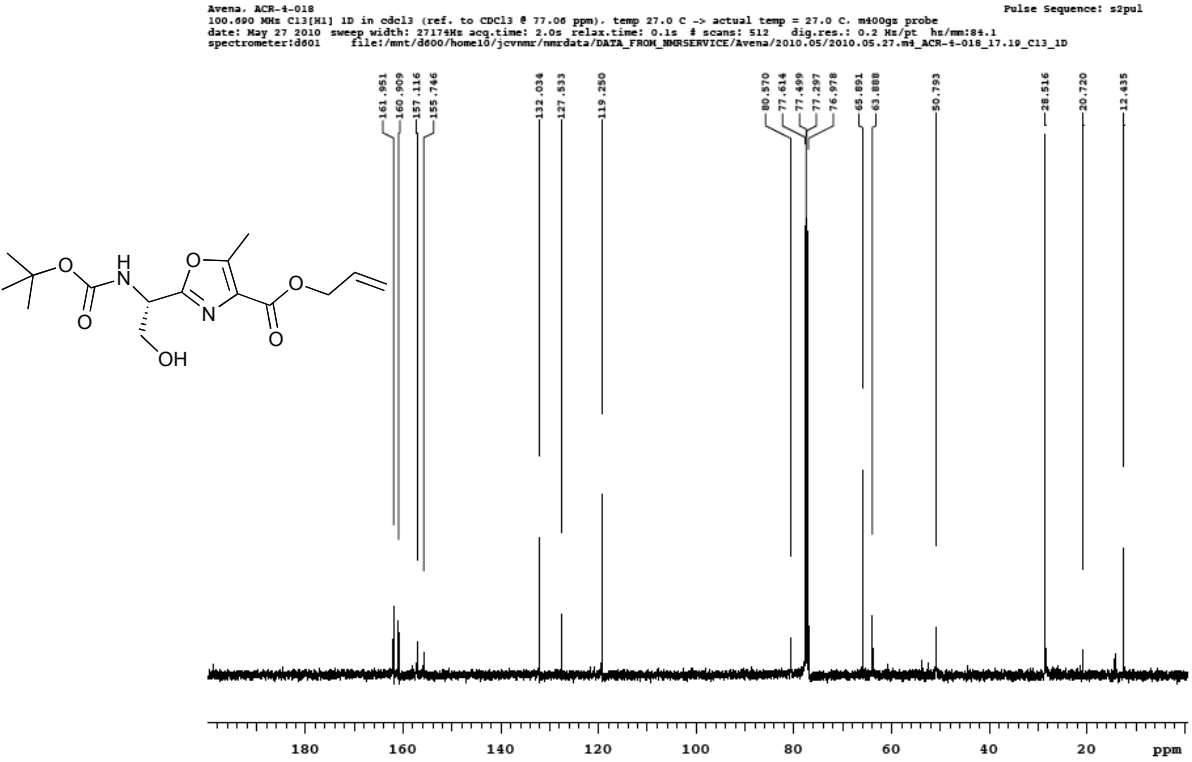



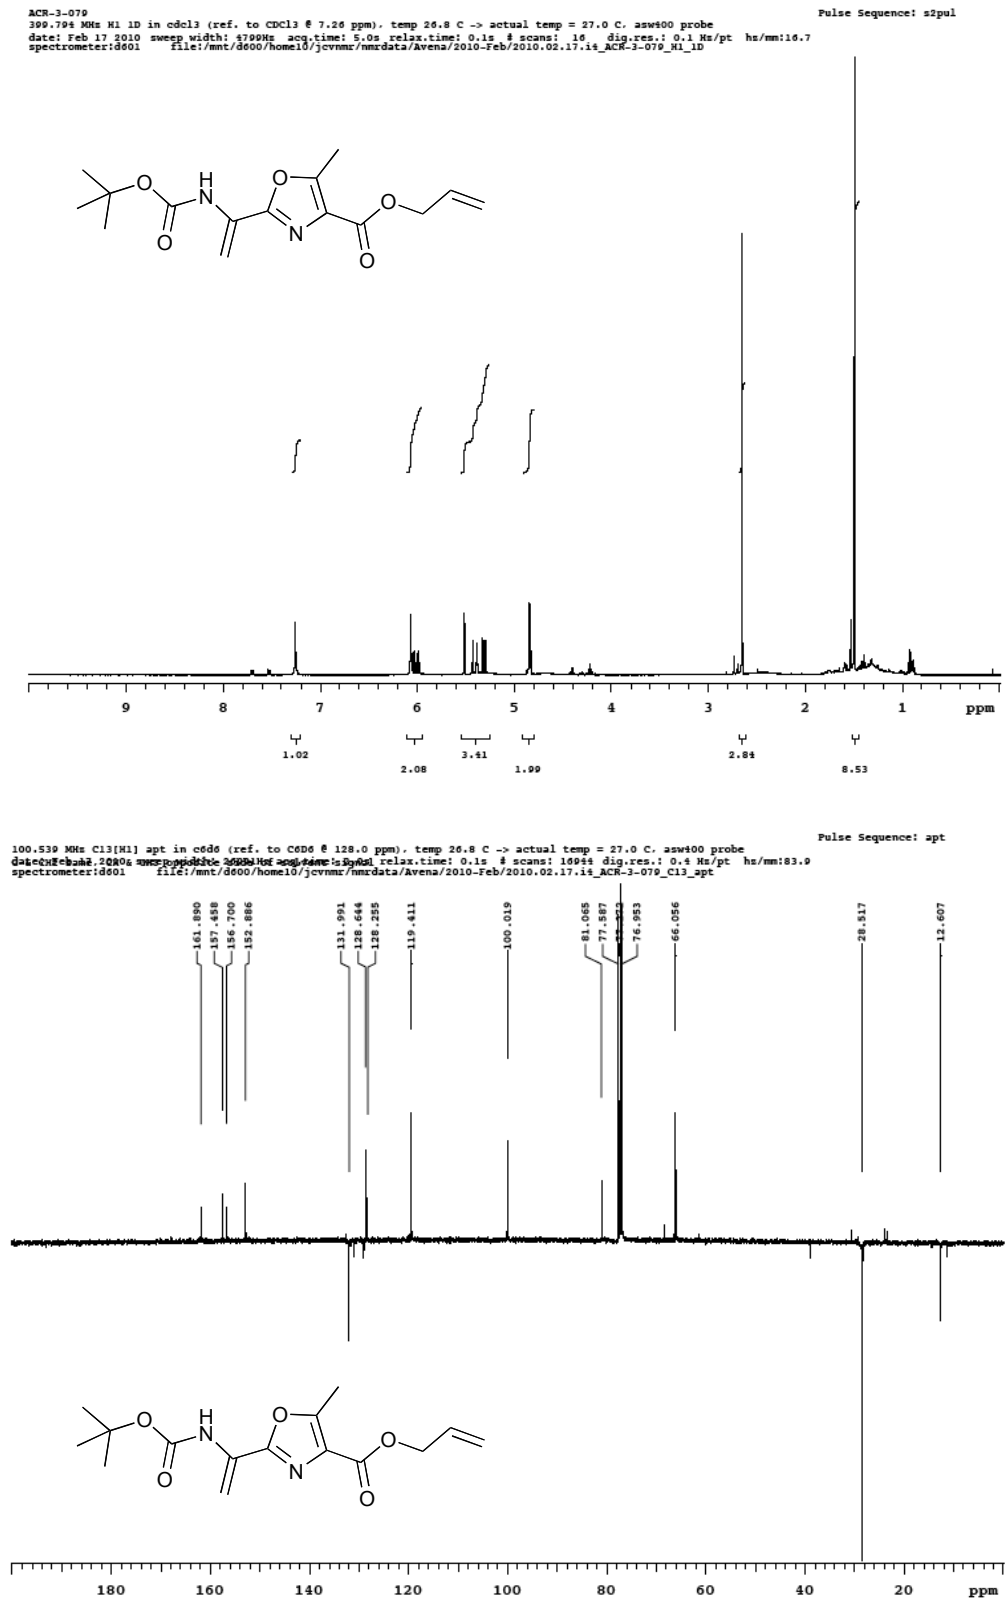

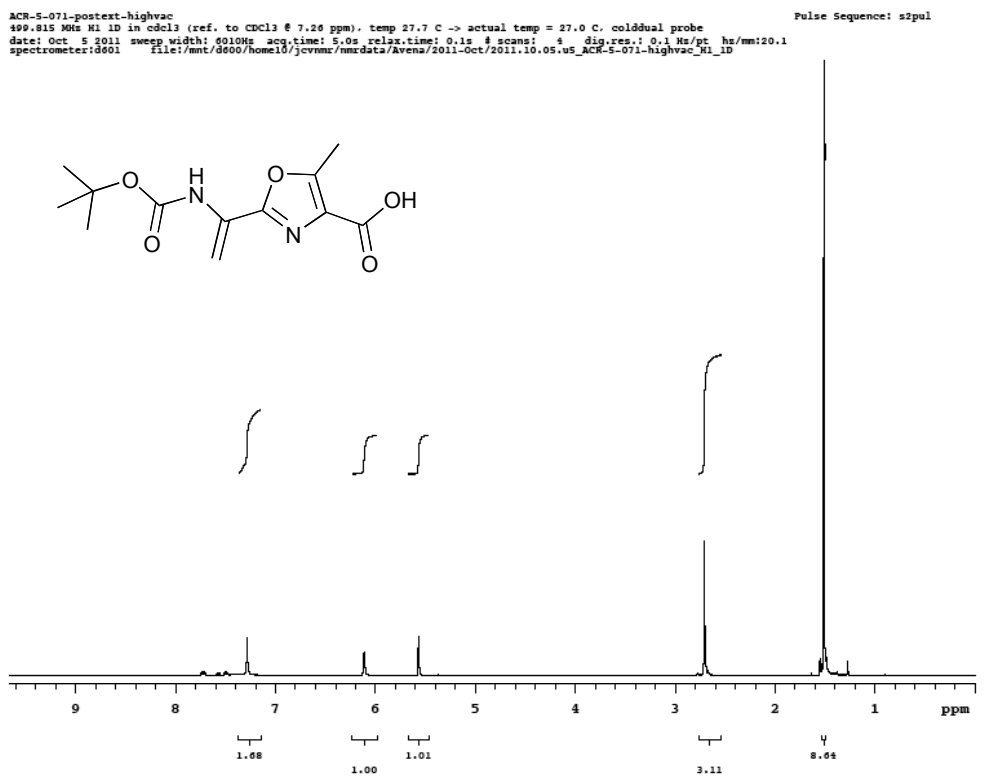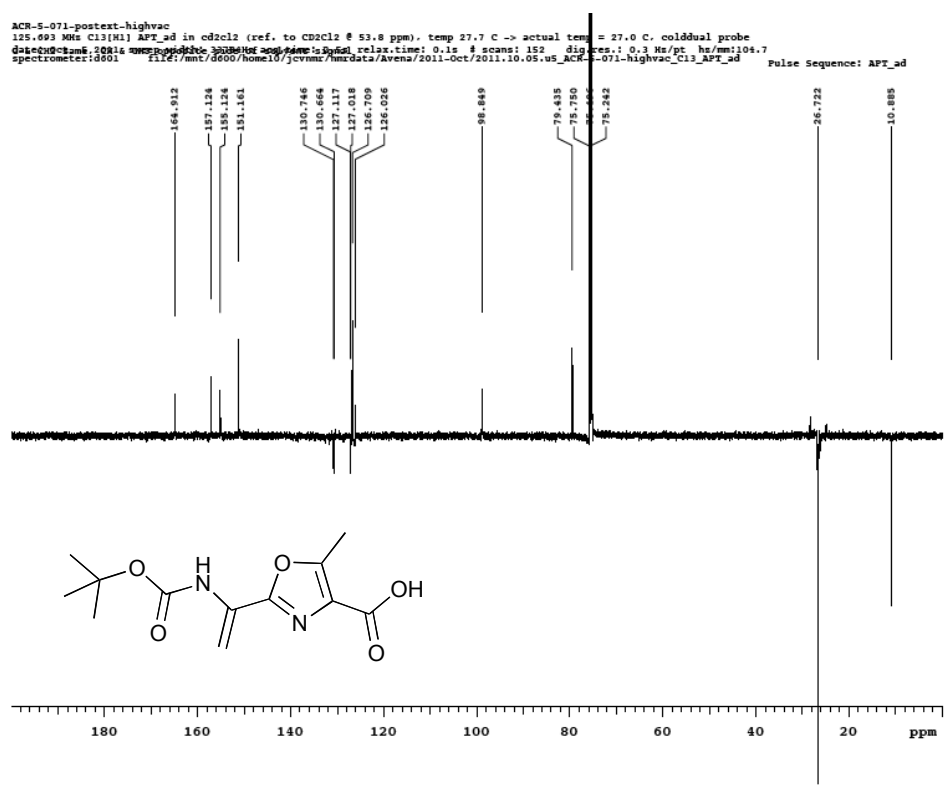

## References

- [1] Mustapa, M. F. M.; Harris, R.; Bulic-Subanovic, N.; Elliot, S. L.; Bregant, S.; Groussier, M. F. A.; Mould, J.; Schultz, D.; Chubb, N. A. L.; Gaffney, P. R. J.; Driscoll, P. C.; Tabor, A. B. *J. Org. Chem.* **2003**, *68*, 8185.
- [2] Pattabiraman, V. R.; McKinnie, S. M. K.; Vederas, J. C. *Angew. Chem. Int. Ed.* **2008**, *47*, 9472.
- [3] Ross, A. C.; Liu, H.; Pattabiraman, V. R.; Vederas, J. C. *J. Am. Chem. Soc.* **2010**, *132*, 462.
- [4] Ross, A. C.; McKinnie, S. M. K.; Vederas, J. C. *J. Am. Chem. Soc.* **2012**, ASAP.
- [5] Chen, J.; Fu, X.-G.; Zhou, L.; Zhang, J.-T.; Qi, X.-L.; Cao, X.-P. *J. Org. Chem.* **2009**, *74*, 4149.
- [6] Wipf, P.; Miller, C. P. *J. Org. Chem.*, **1993**, *58*, 3604.
